# Supplementary material for: Synthesis of β-lactams via diastereoselective, intramolecular Kinugasa reactions
Source: Royal Society of Chemistry journal article supplement (doi:10.1039/d0ob00228c), 2020-01-01
Supplement: d0ob00228c1.pdf [file d0ob00228c1.pdf]

# Synthesis of $\beta$ -lactams *via* diastereoselective, intramolecular Kinugasa reactions

Oskar Popik, Barbara Grzeszczyk, Olga Staszewska-Krajewska, Bartłomiej Furman and Marek Chmielewski\*

Institute of Organic Chemistry of the Polish Academy of Sciences, Kasprzaka 44/52, 01-224 Warsaw, Poland. E-mail: [marek.chmielewski@icho.edu.pl](mailto:marek.chmielewski@icho.edu.pl)

Table of Contents:

PAGE S1: Scans of  $^1\text{H}$  and  $^{13}\text{C}$  NMR Spectra and NOE measurements

PAGE S33: Separate ECD analyses

PAGE S34: X-ray crystallography of **30**

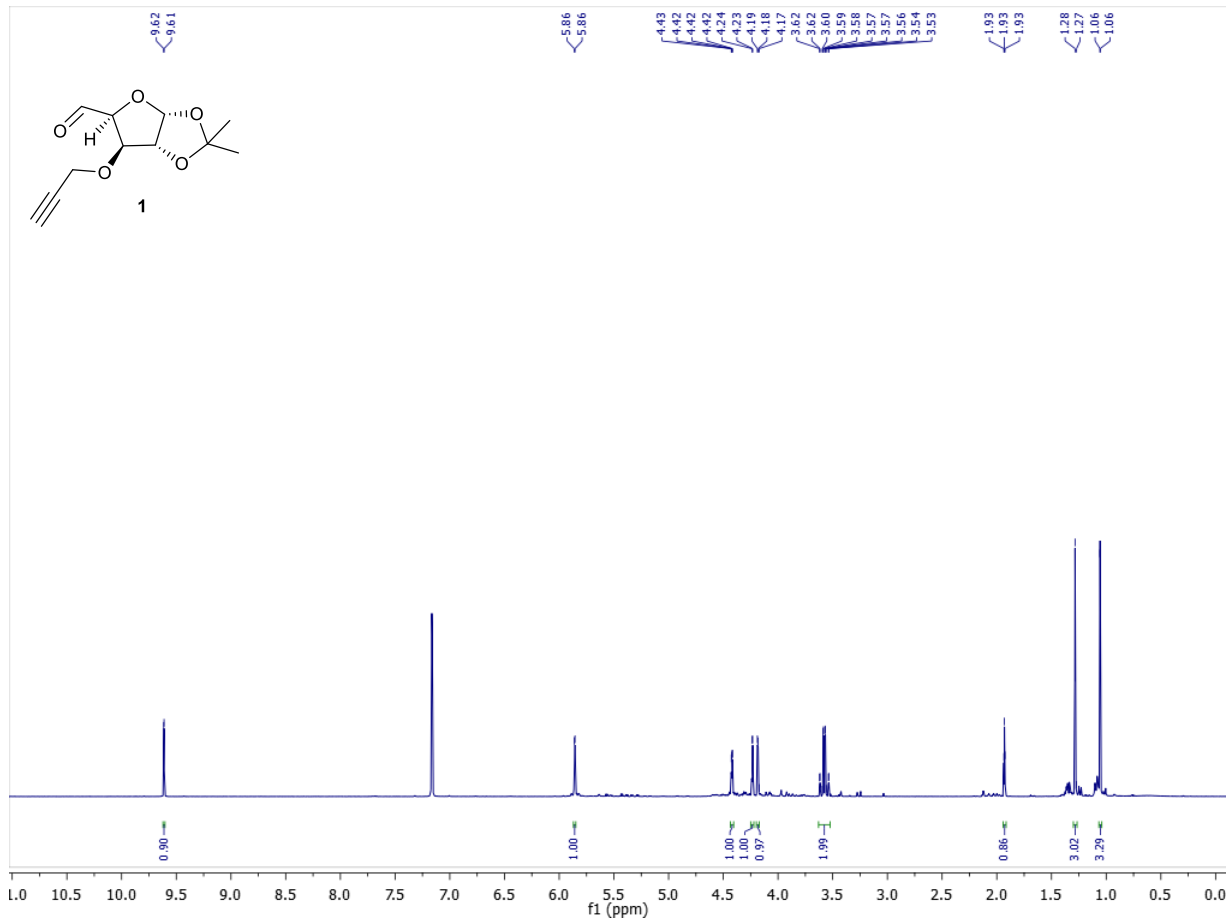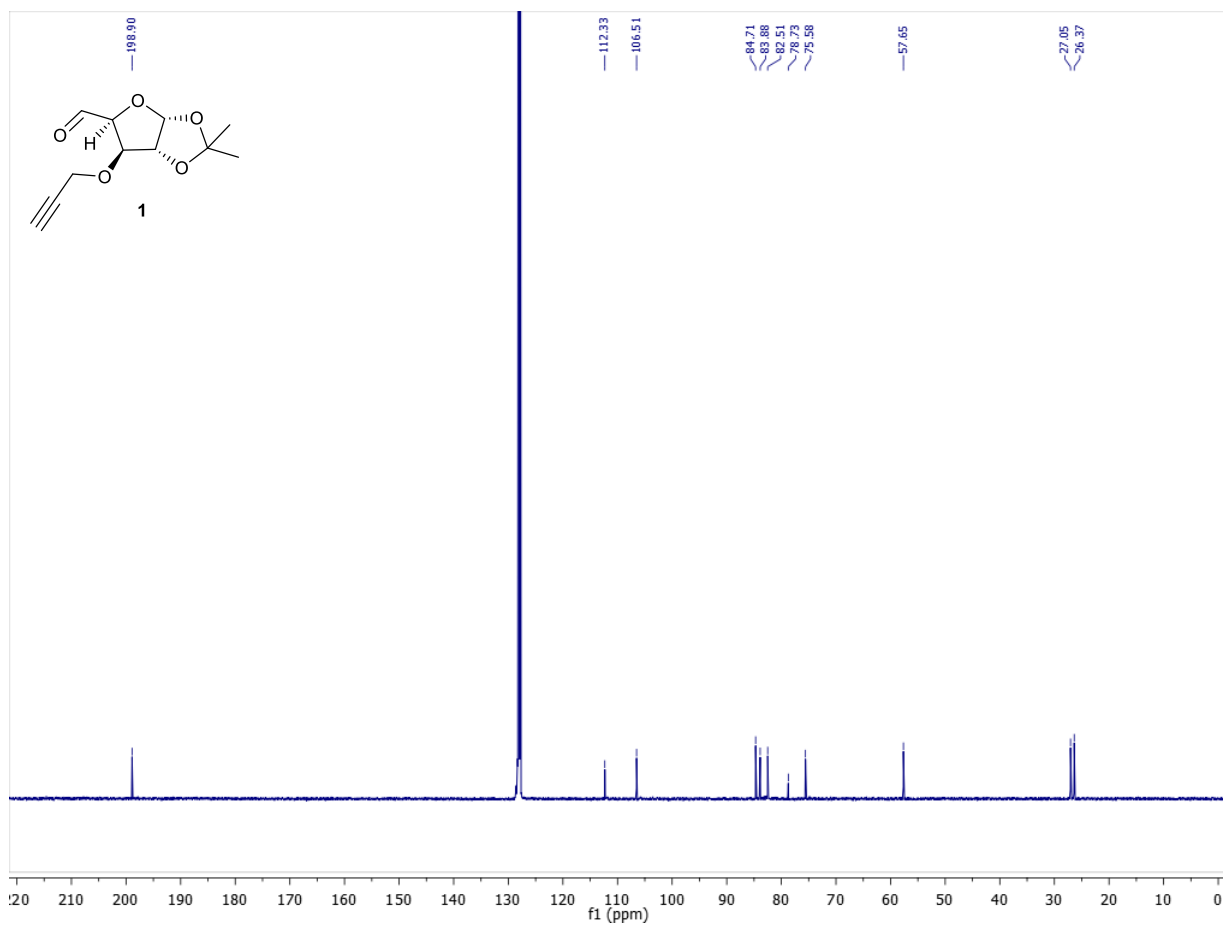

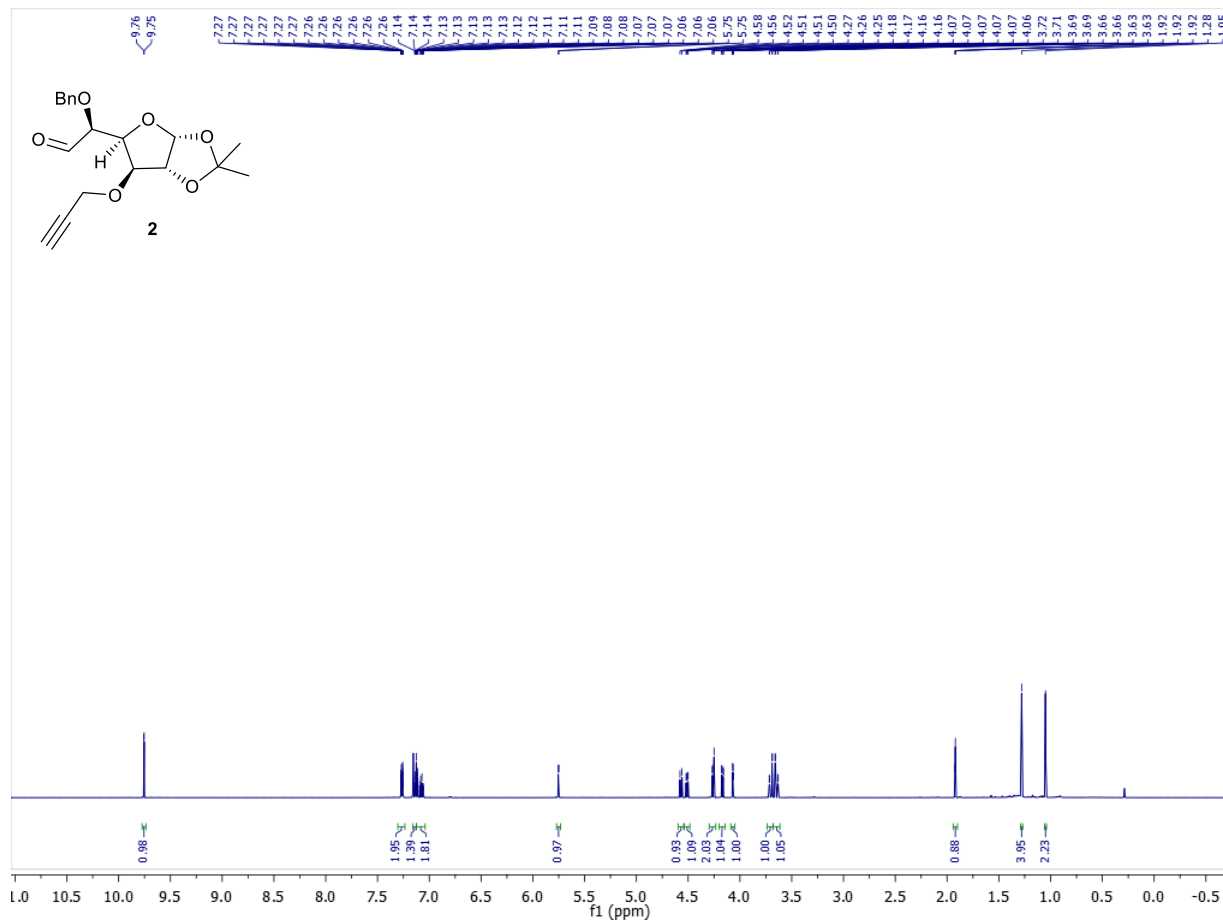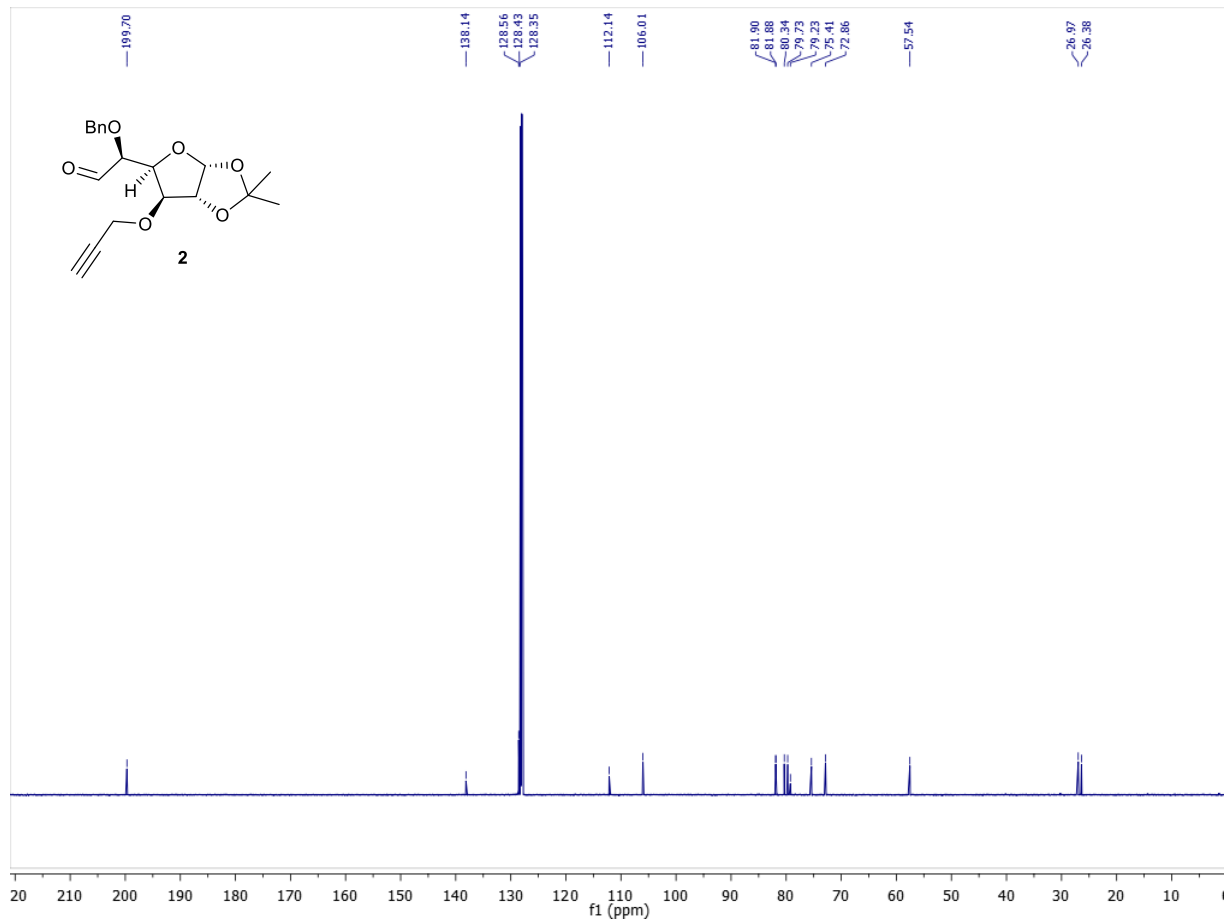

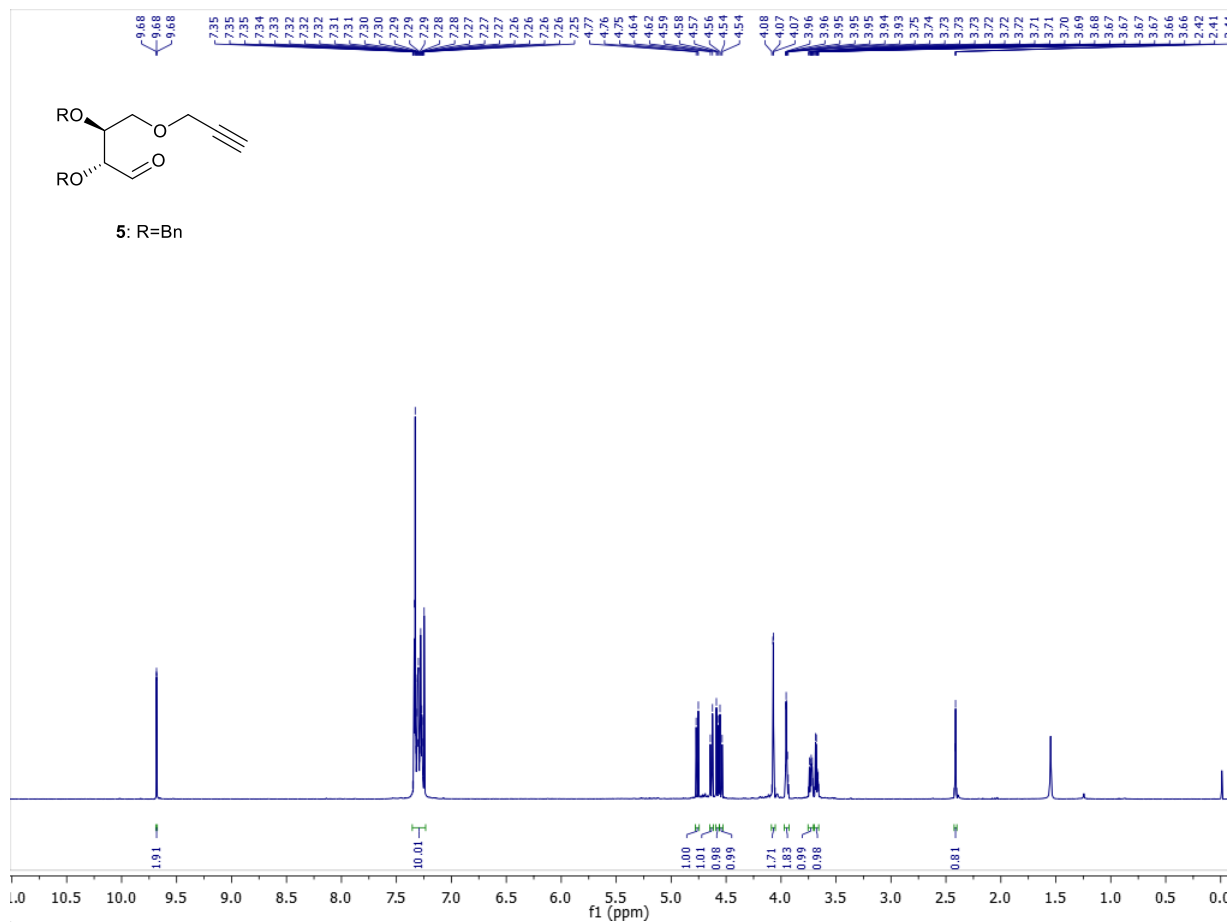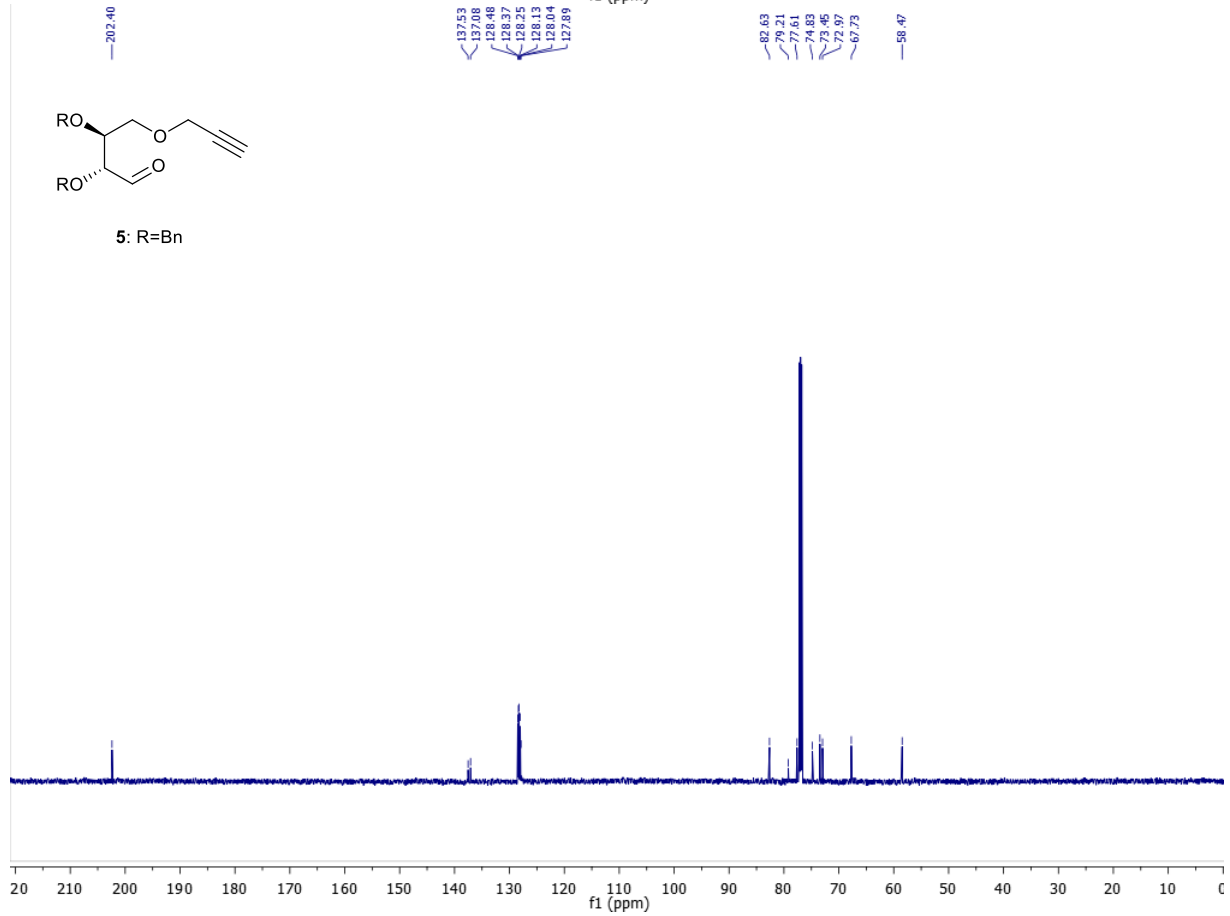

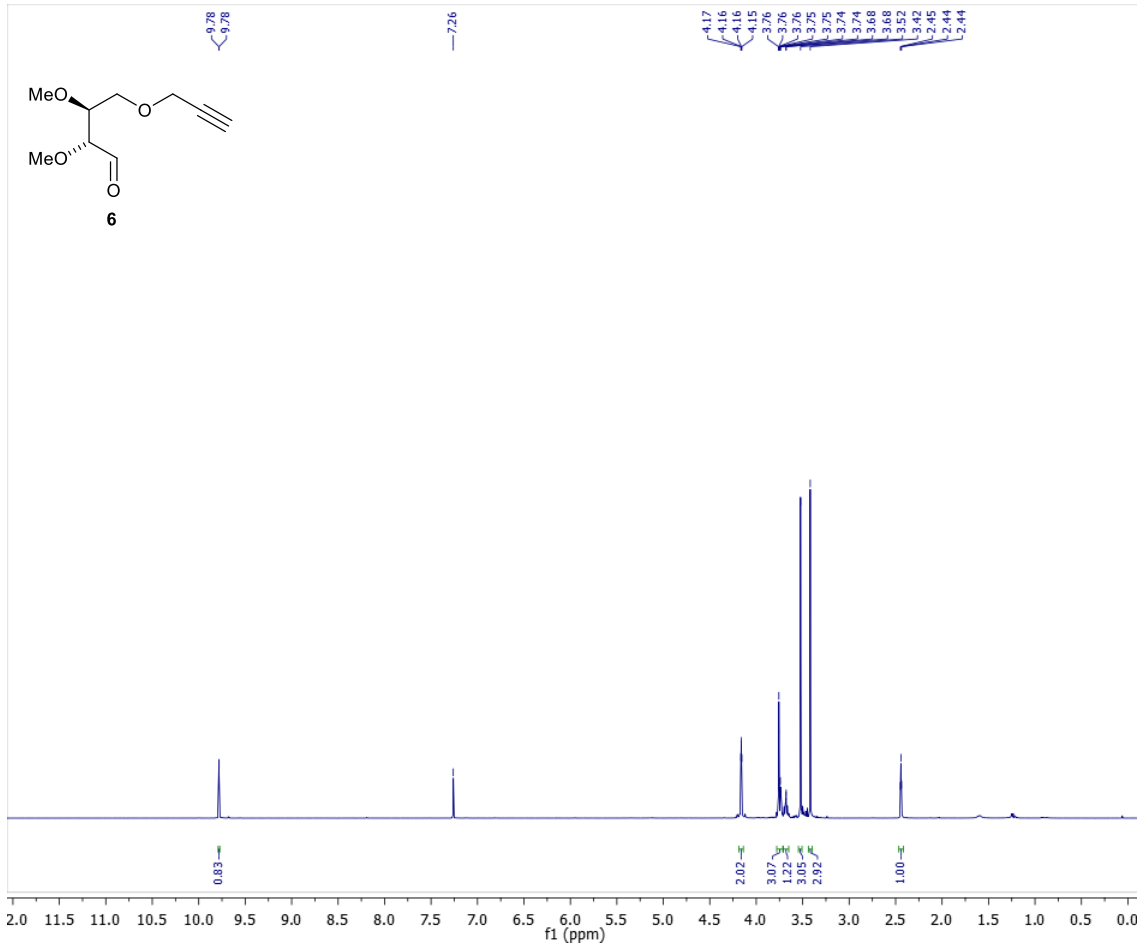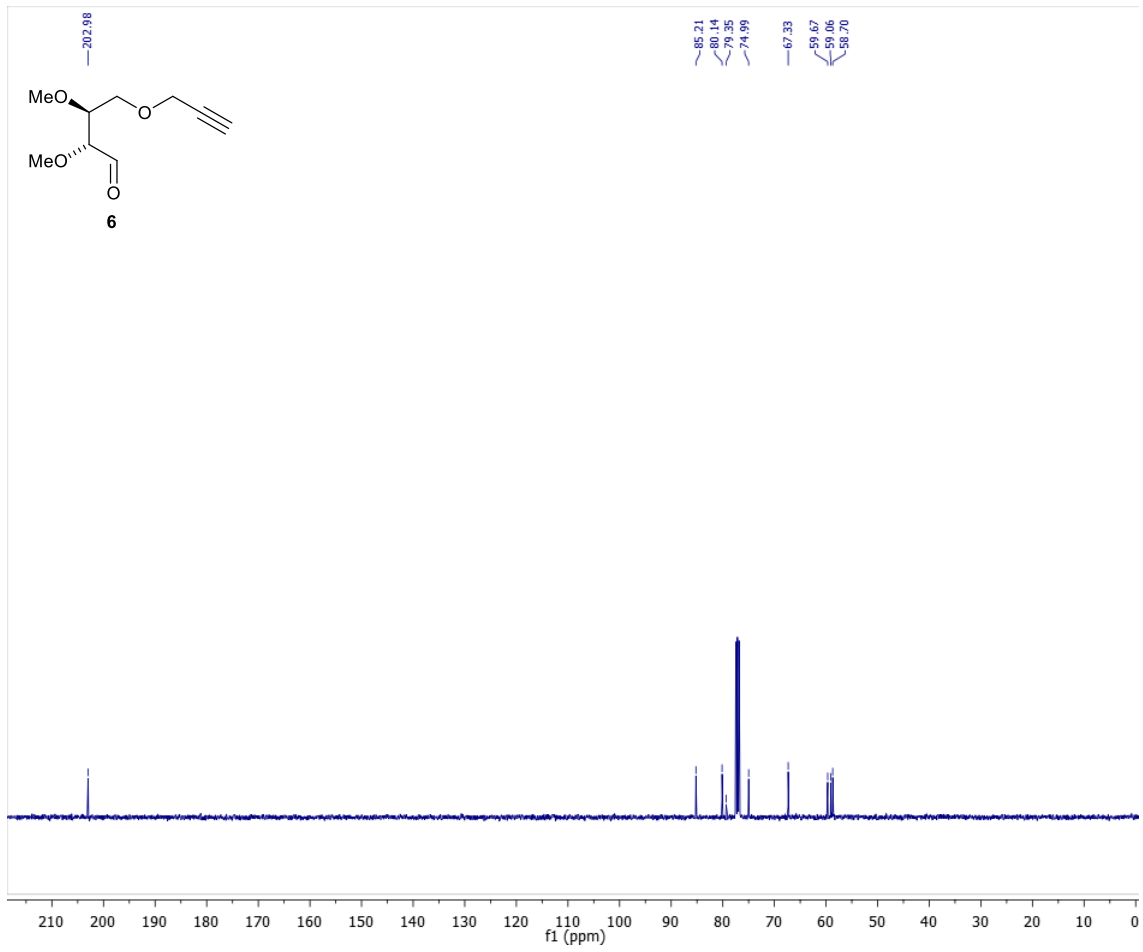

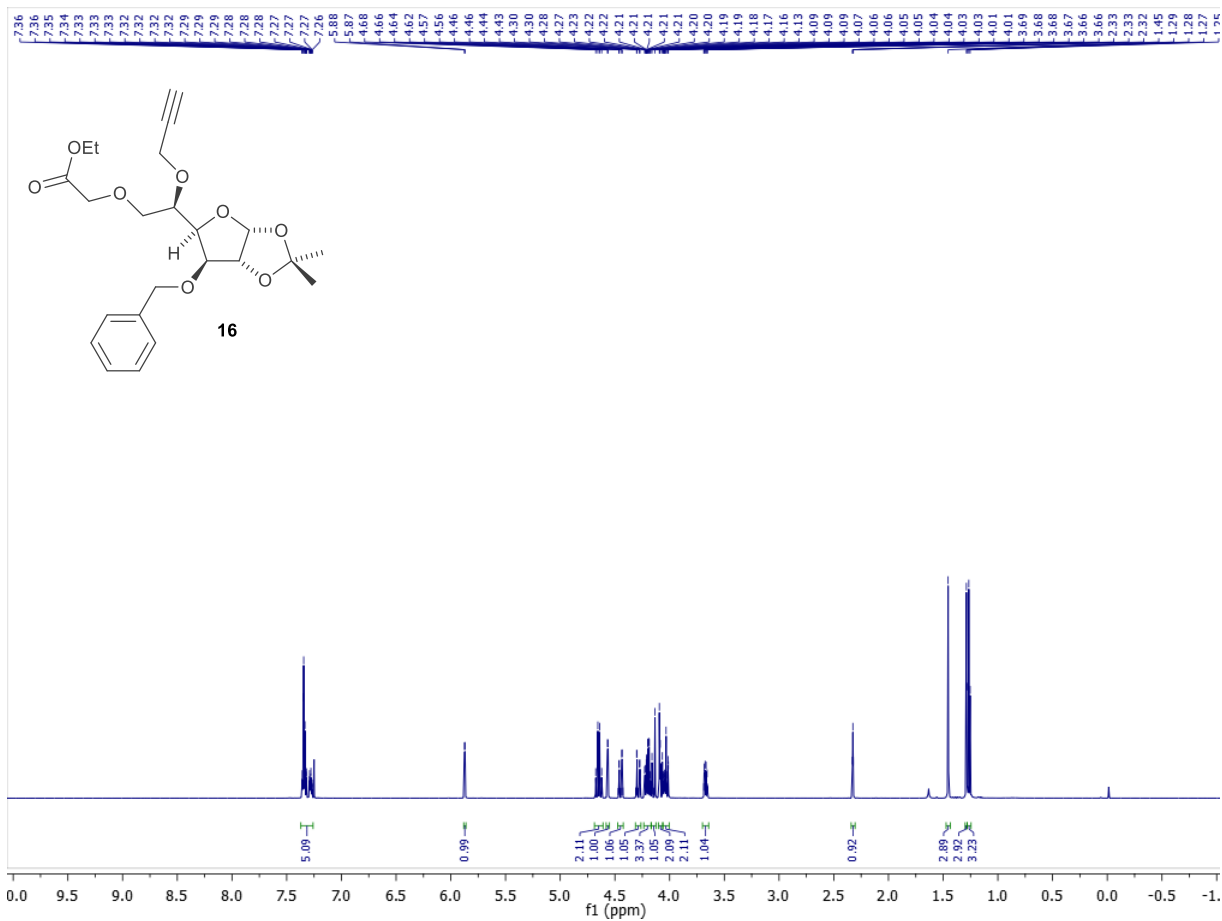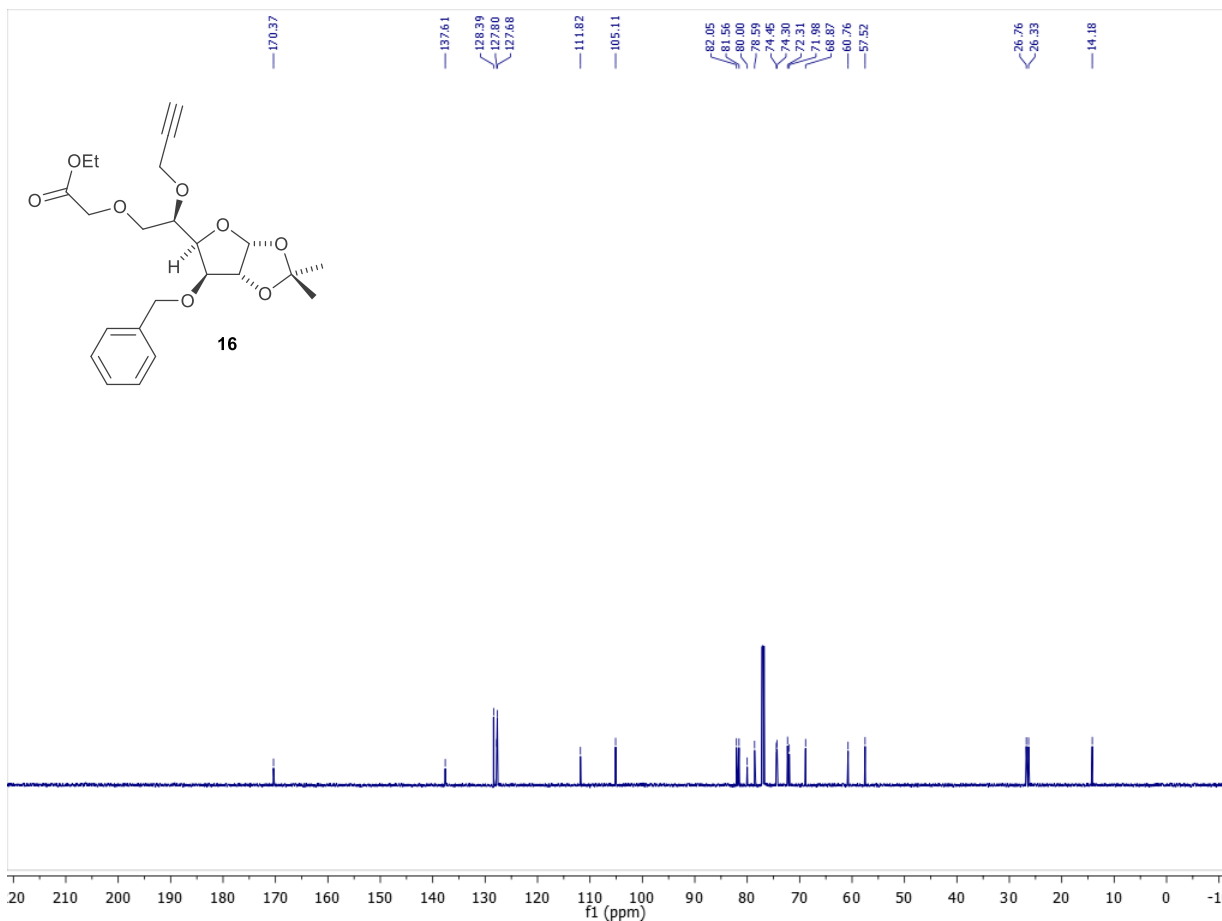

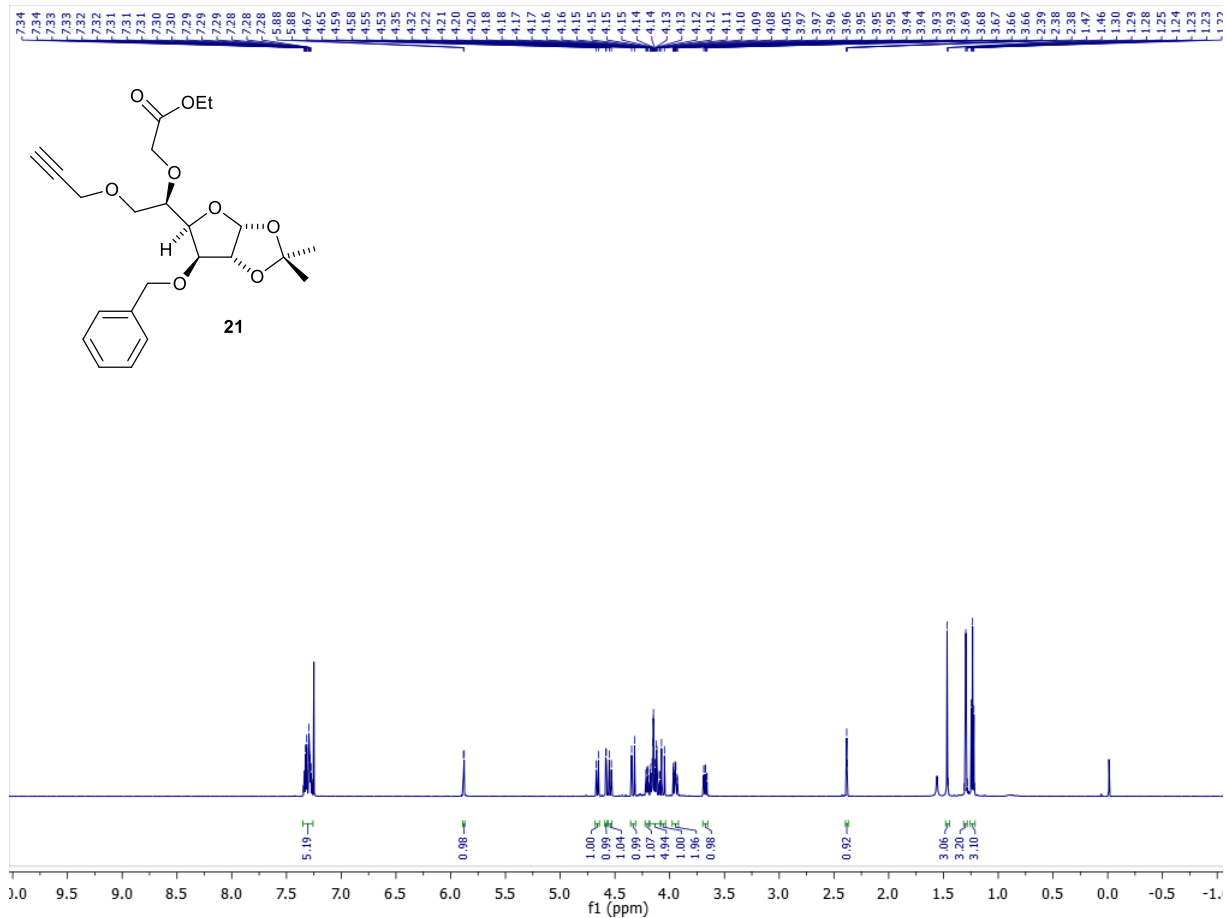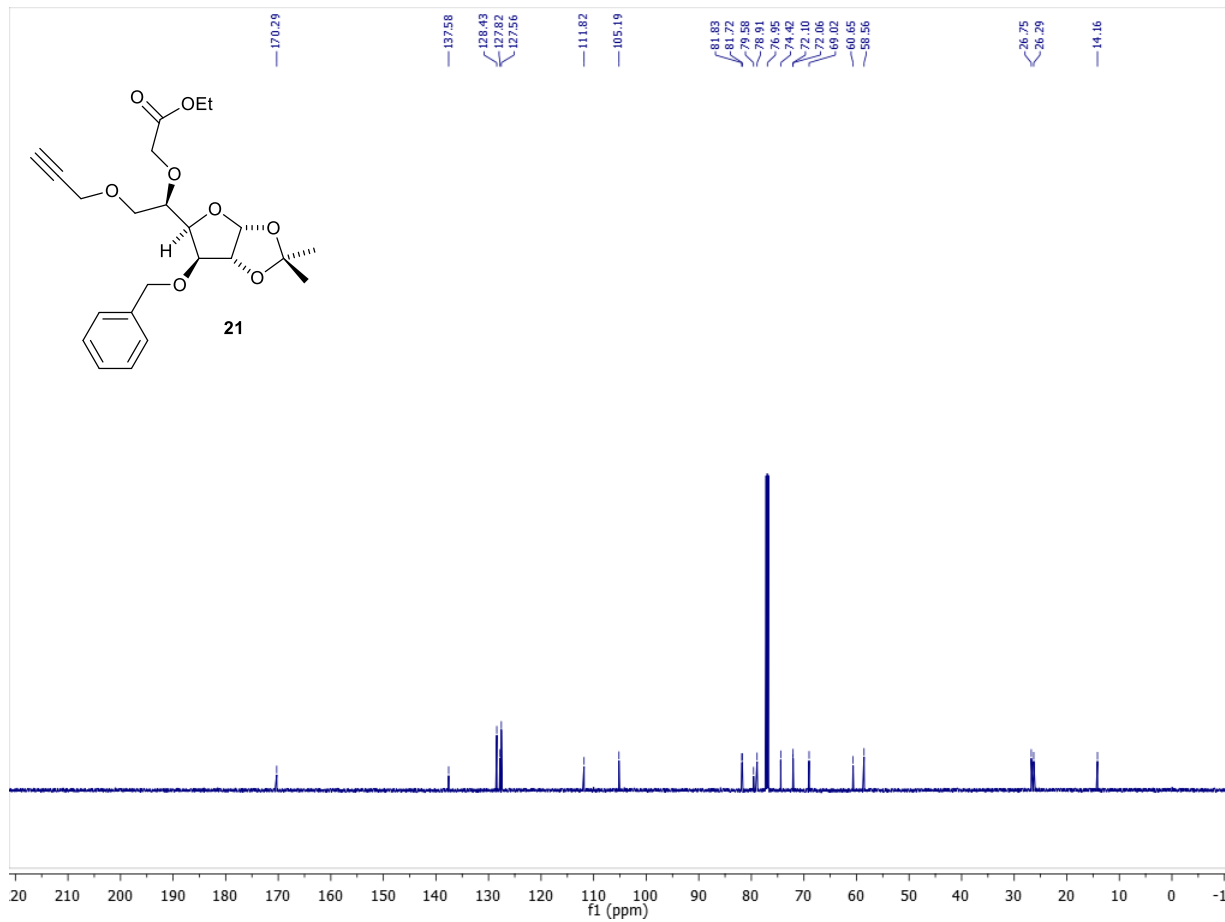

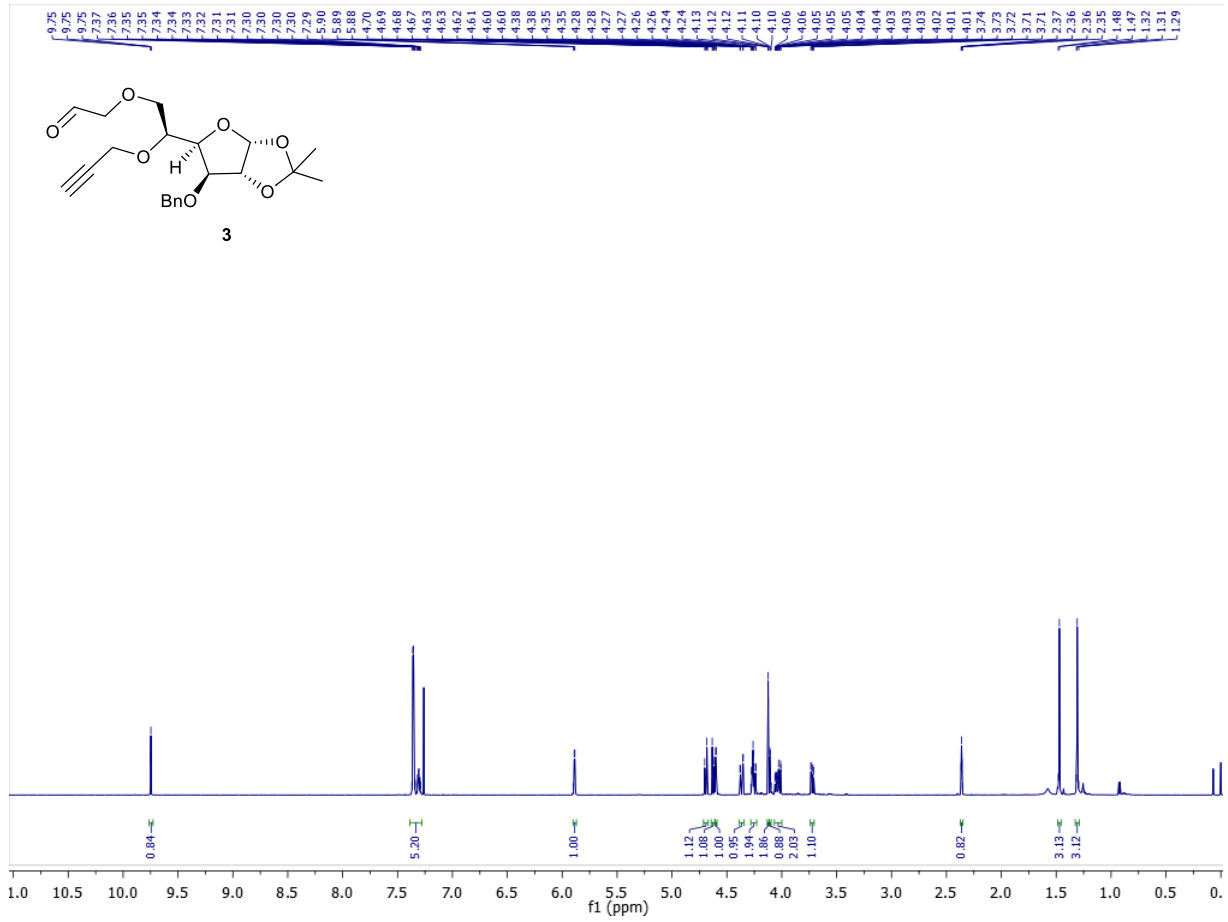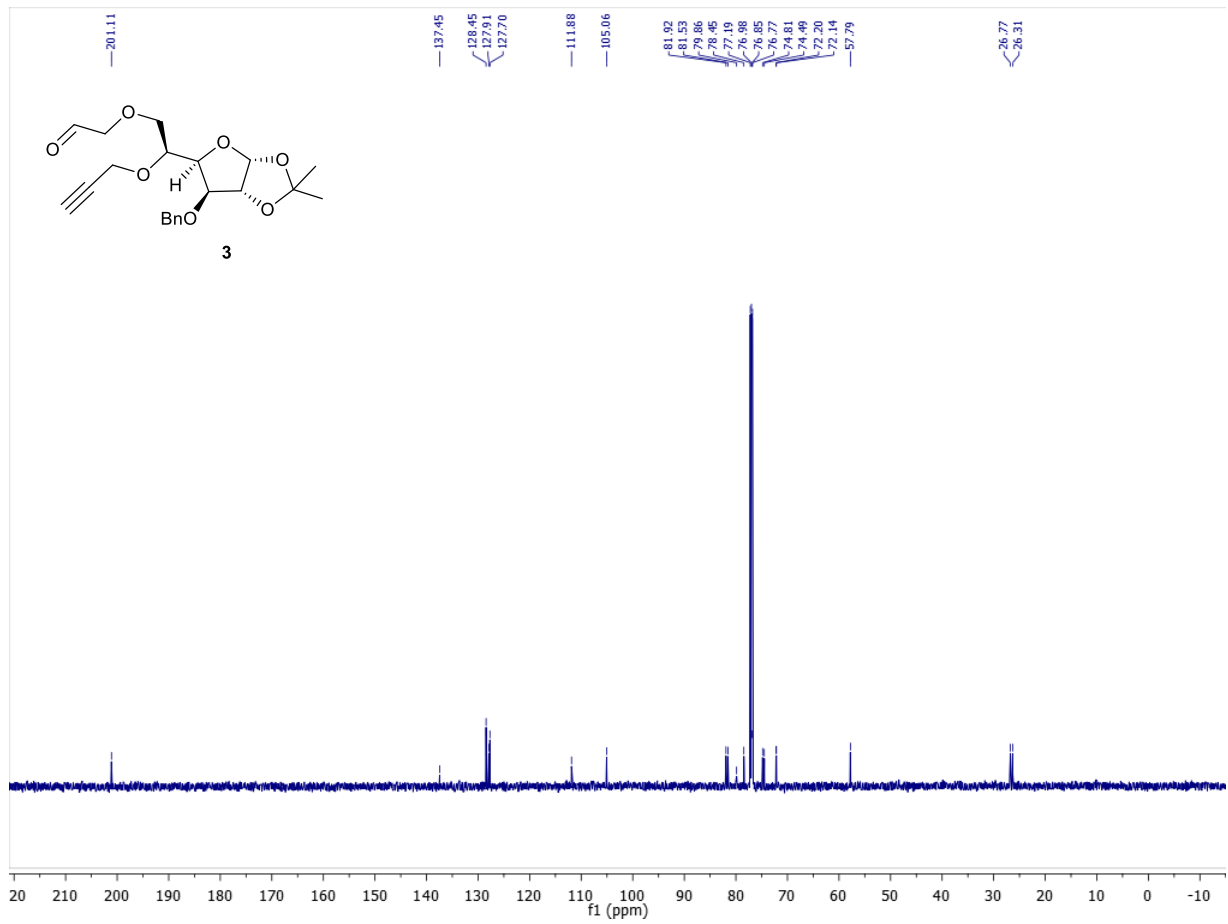



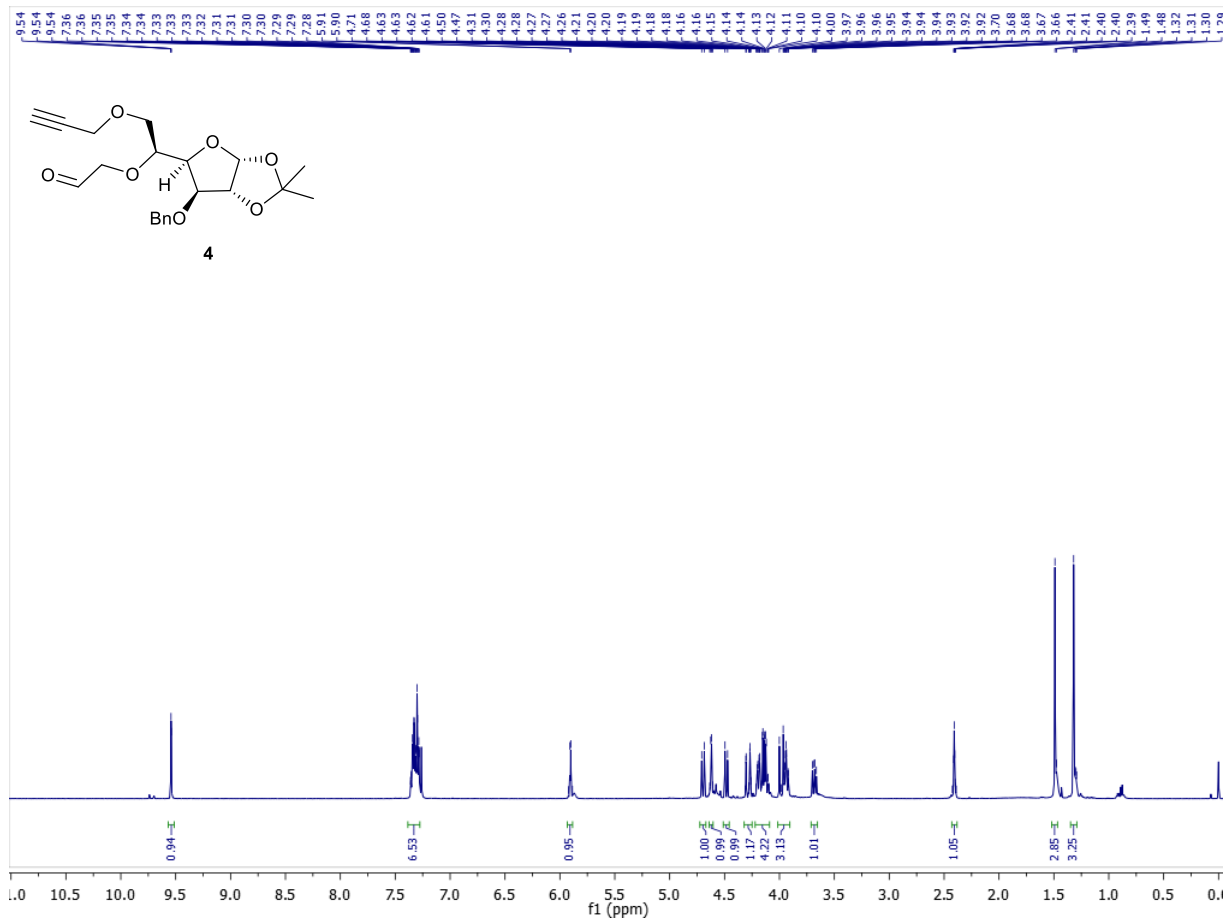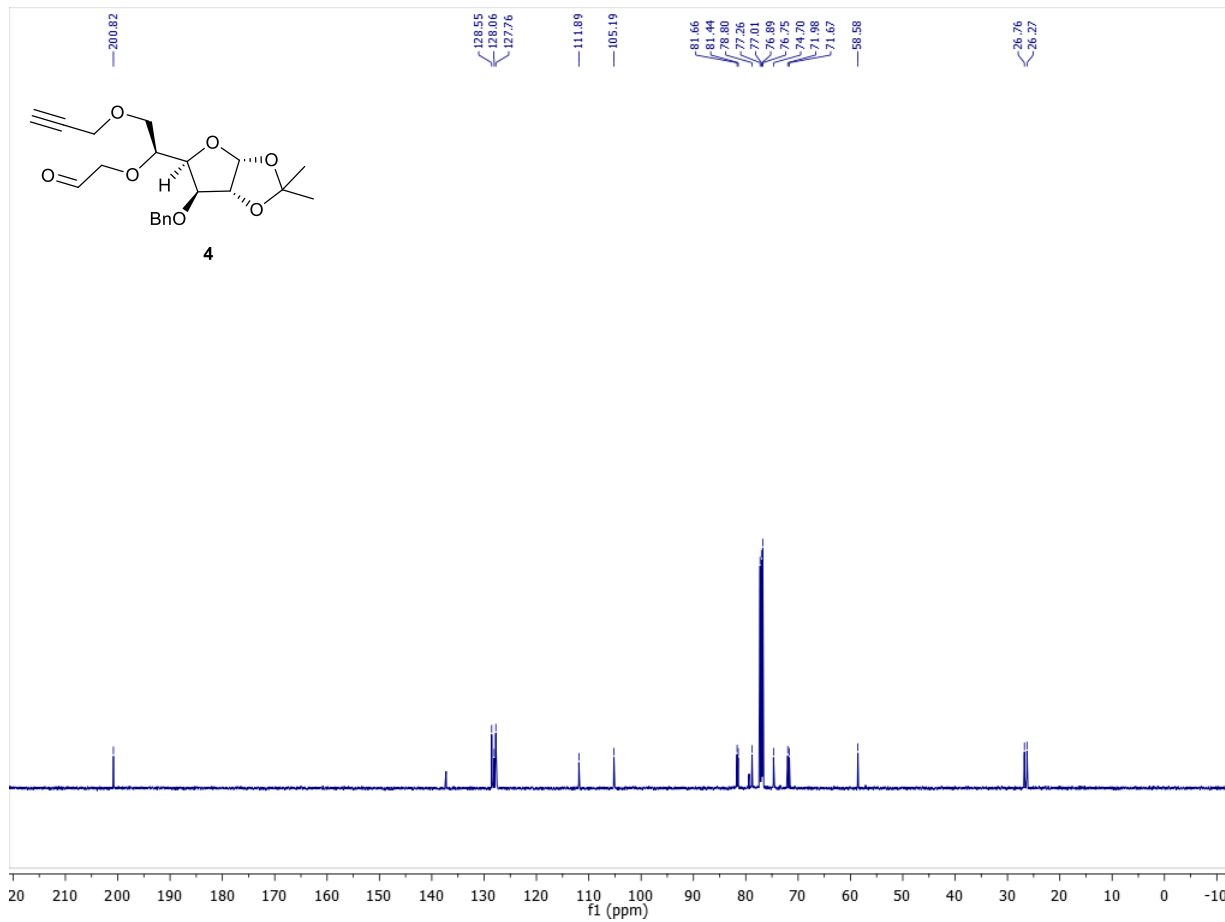

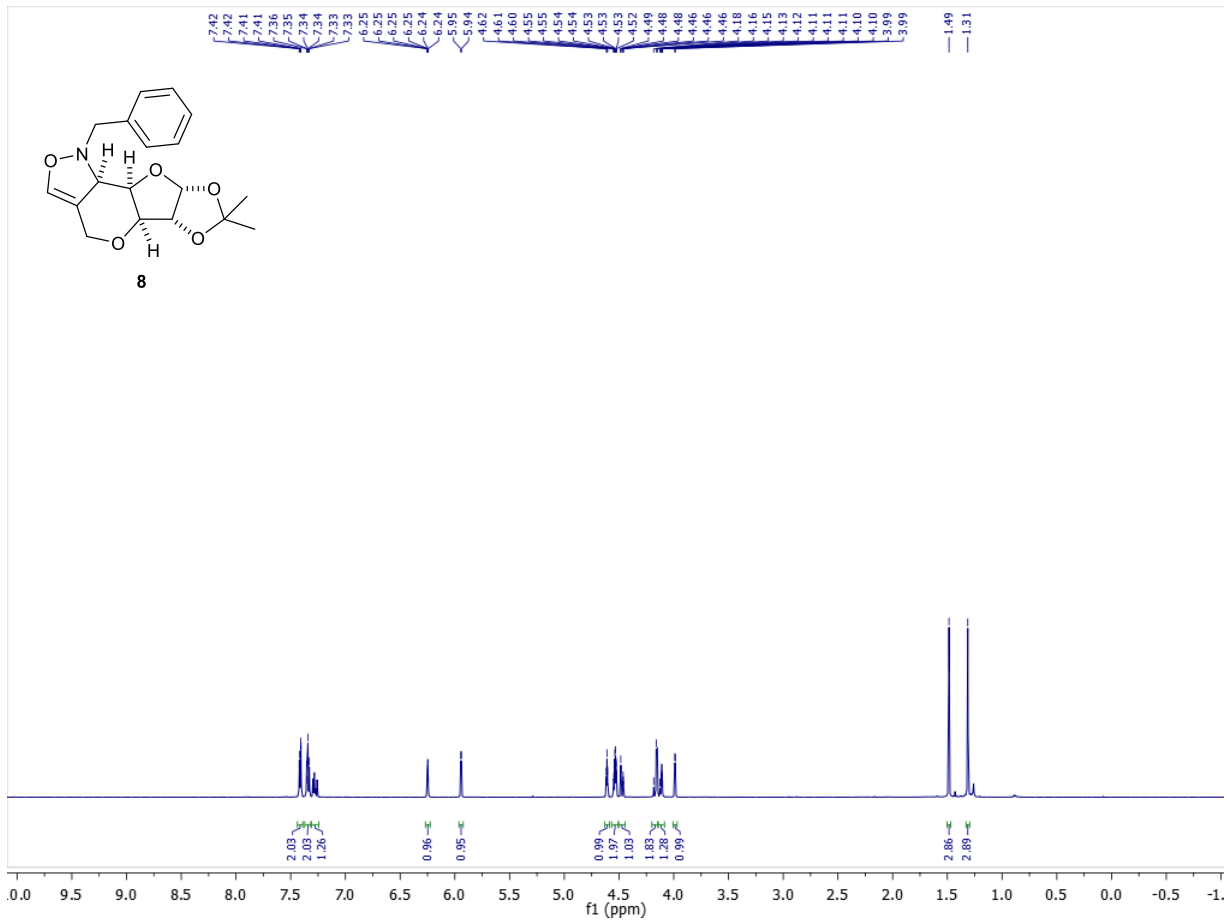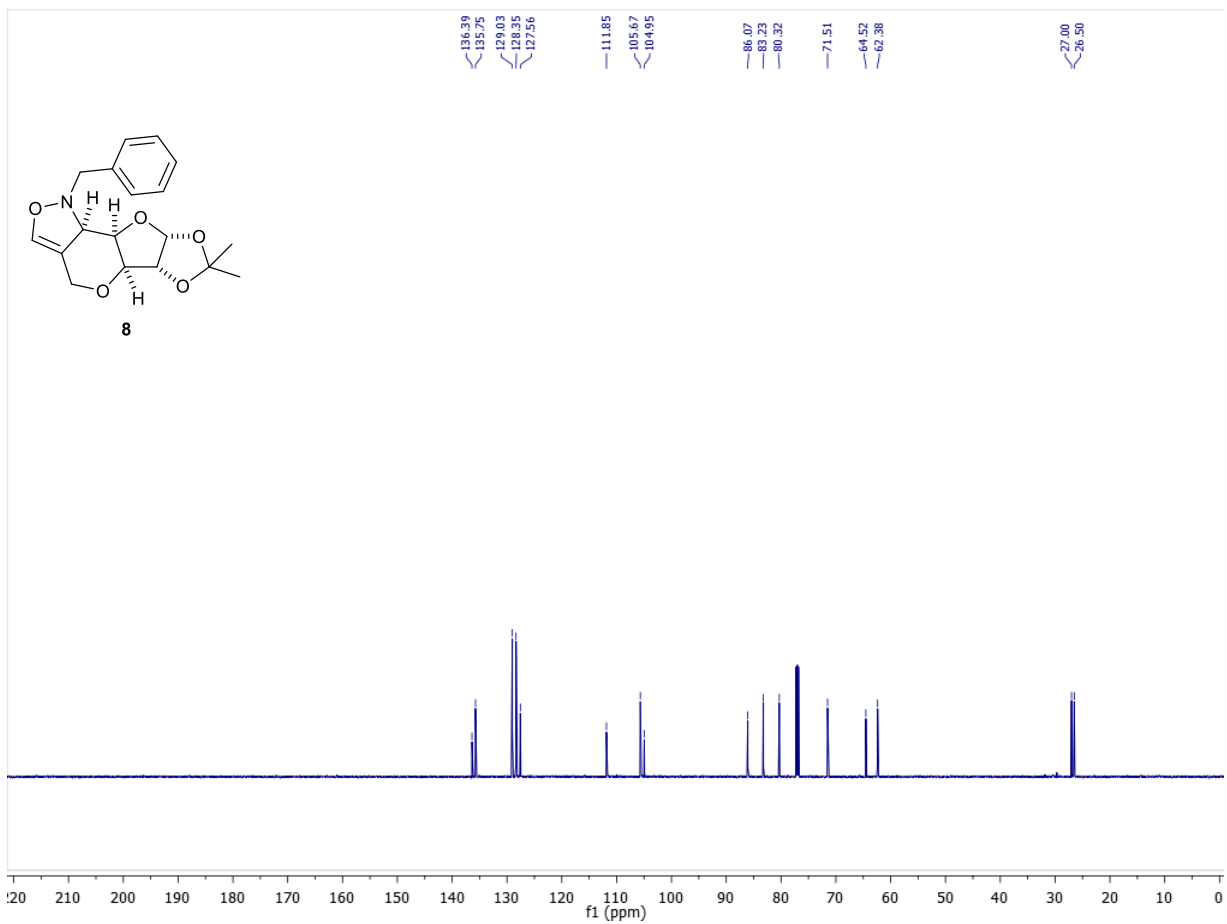

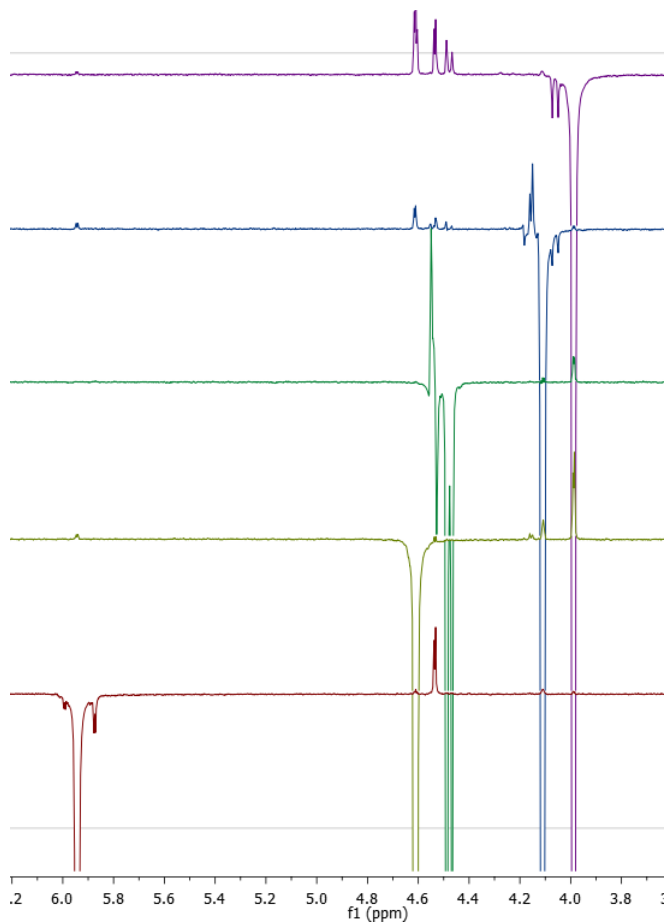

1D NOESY NMR, solvent  $\text{CDCl}_3$

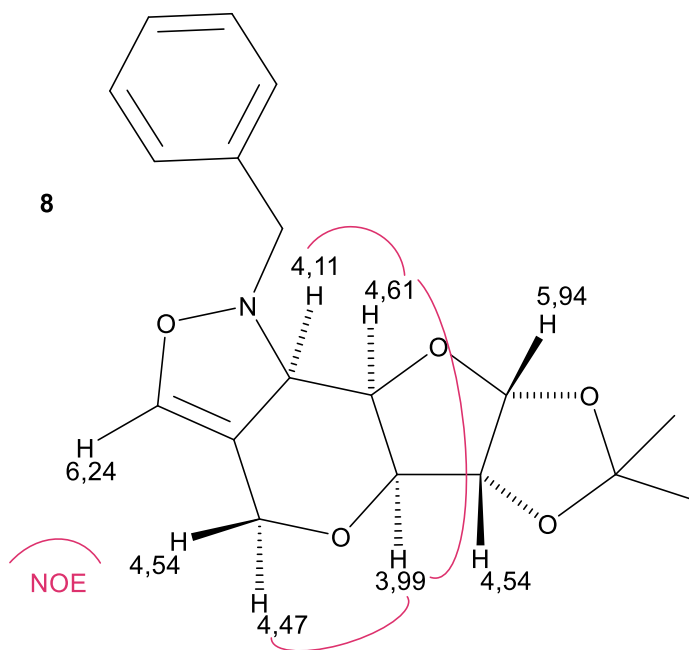

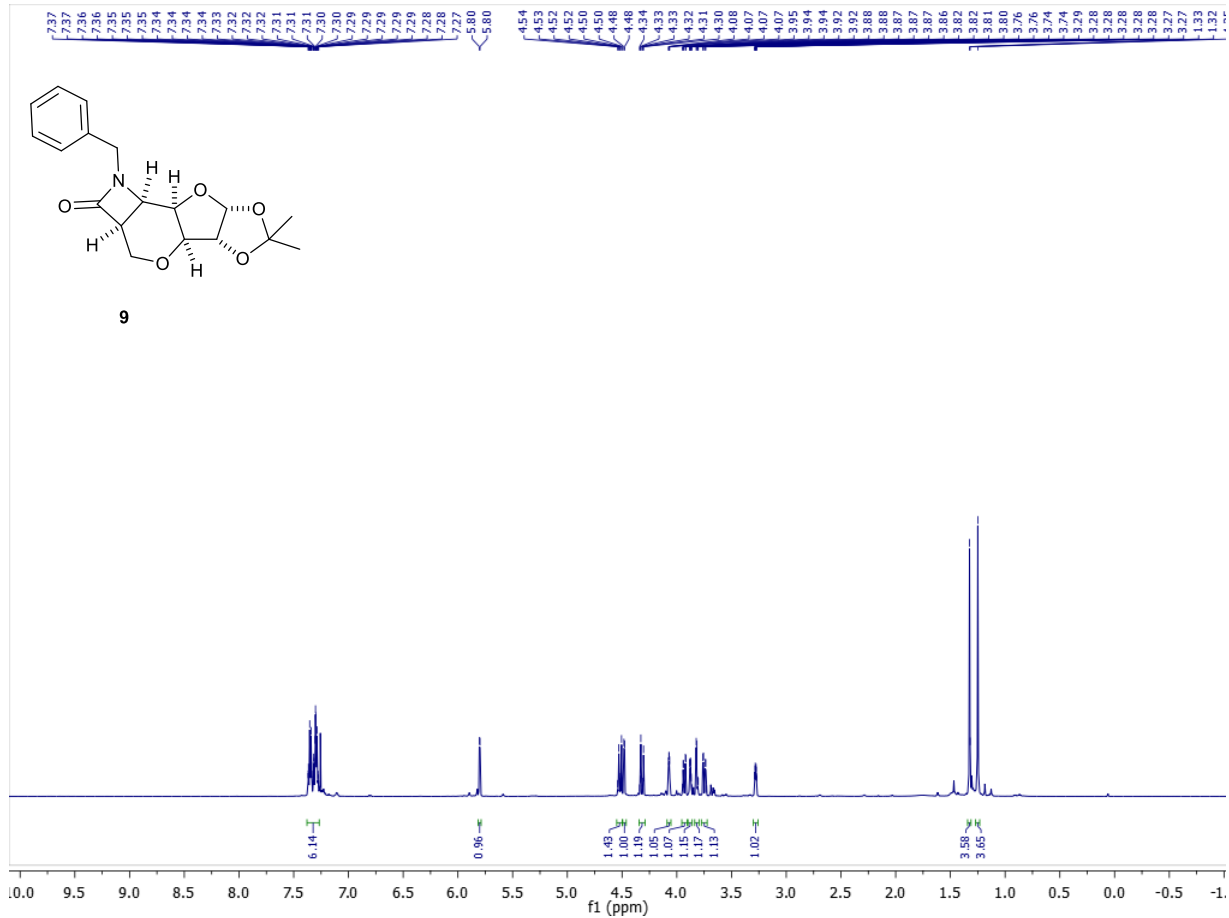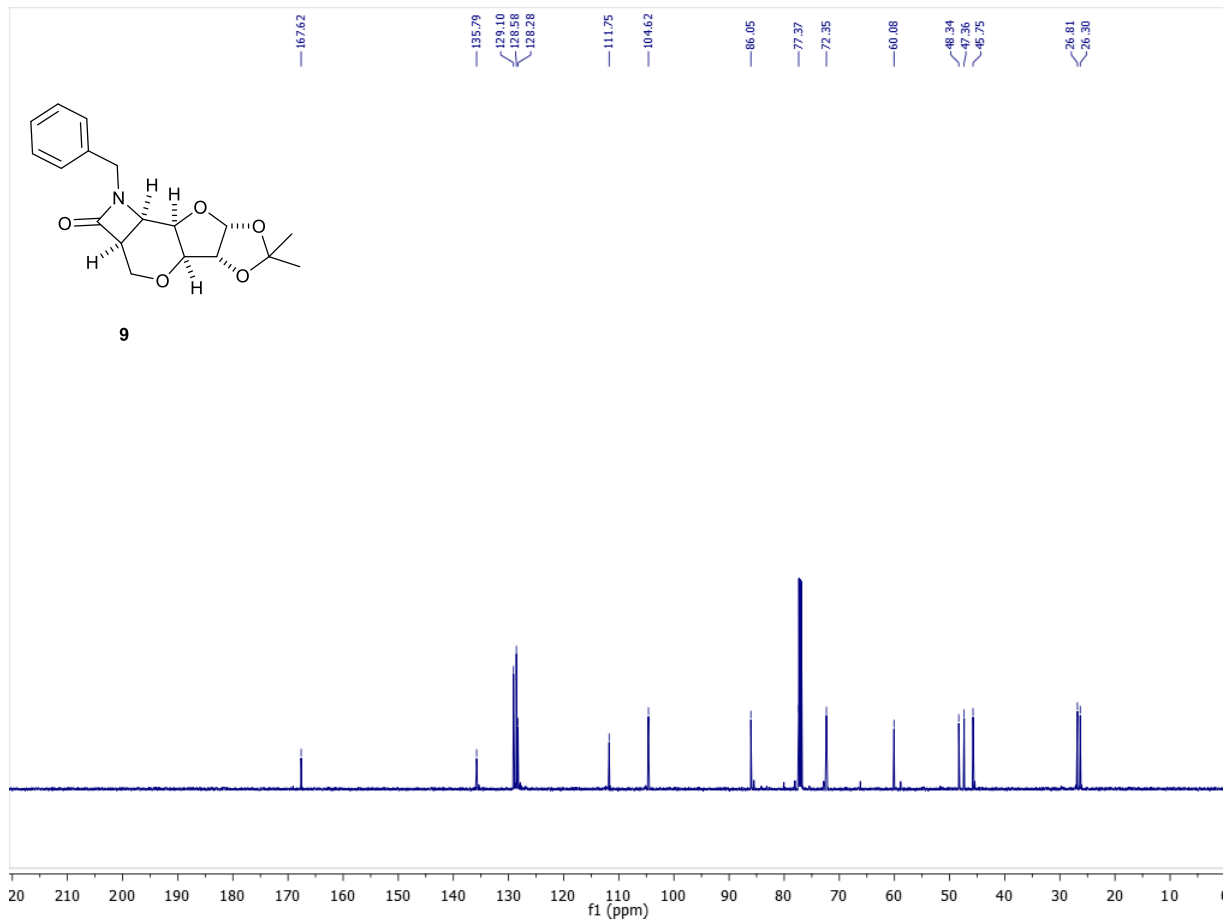

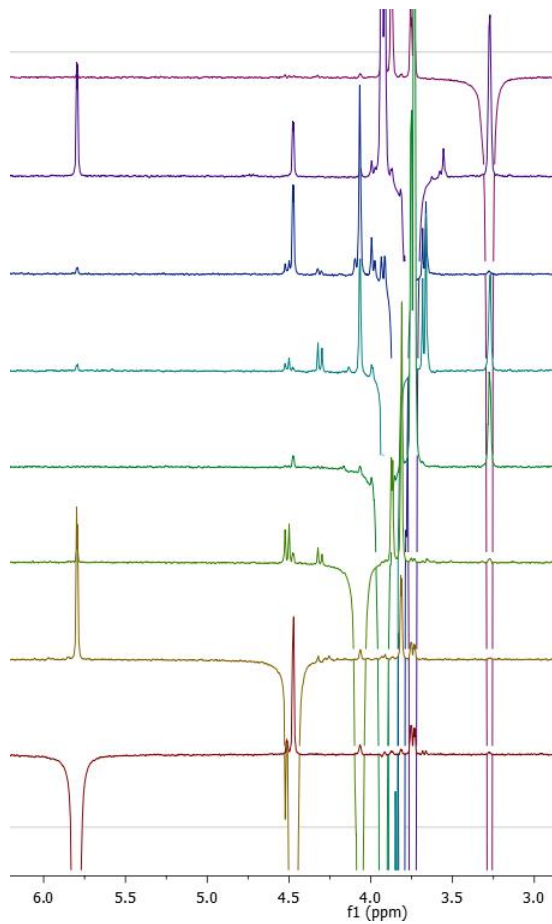

1D NOESY NMR, solvent  $\text{CDCl}_3$

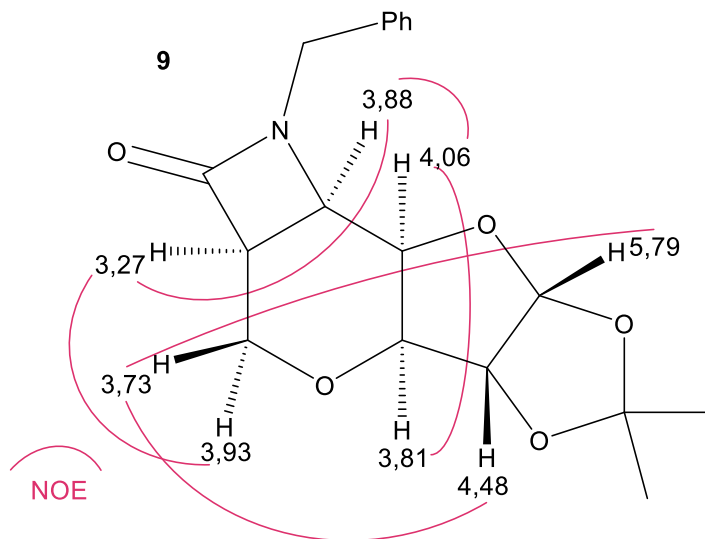

7.39  
7.38  
7.35  
7.35  
7.35  
7.34  
7.33  
7.33  
7.32  
7.32  
7.30  
7.30  
7.29  
7.29  
7.28  
7.28  
7.27  
7.26  
6.48  
6.48  
6.47  
6.47  
6.22  
6.20  
6.19  
5.91  
5.90  
4.61  
4.61  
4.58  
4.57  
4.54  
4.54  
4.52  
4.52  
4.50  
4.49  
4.49  
4.48  
4.47  
4.47  
4.46  
4.46  
4.45  
4.45  
4.44  
4.44  
4.27  
4.26  
4.26  
4.24  
4.24  
4.23  
4.23  
3.94  
3.94  
1.50  
1.32

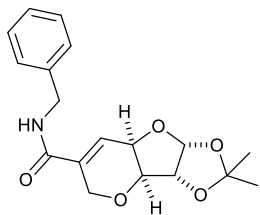

10

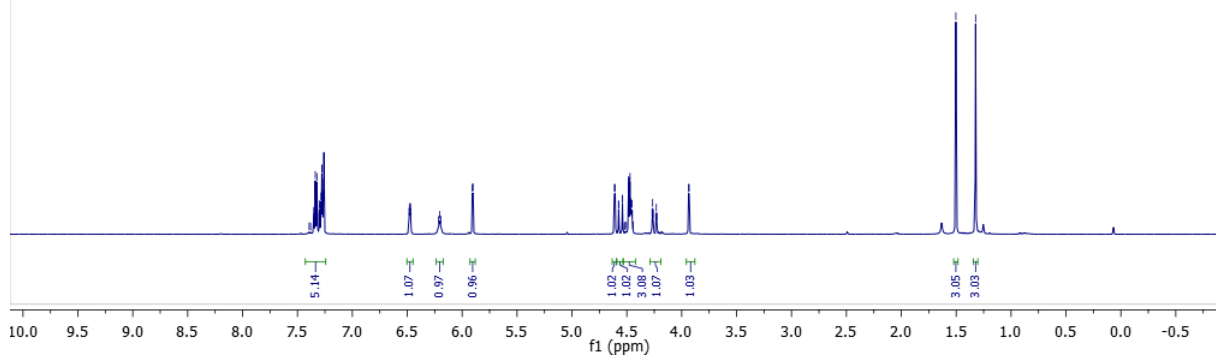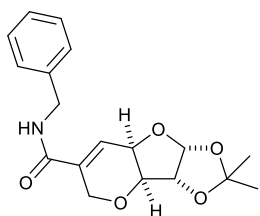

10

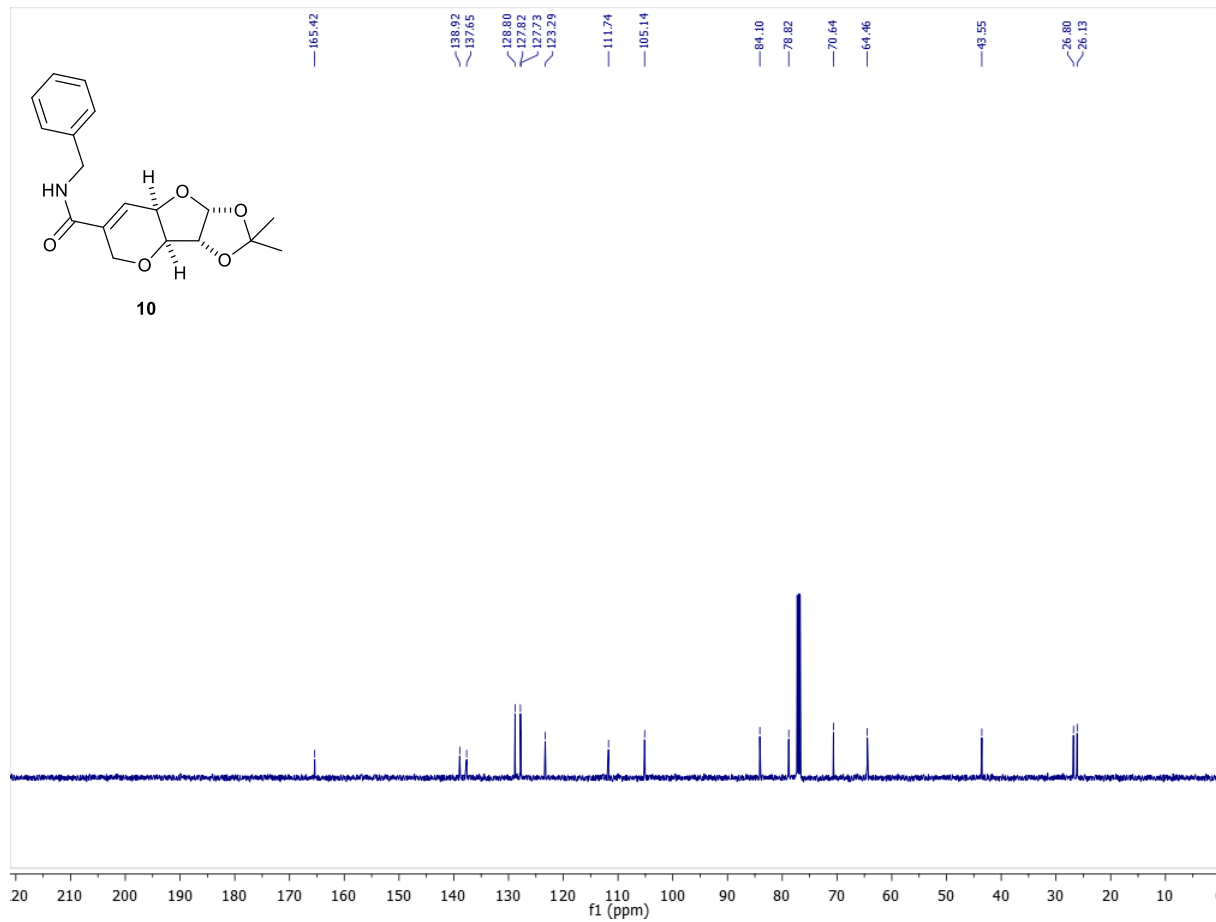

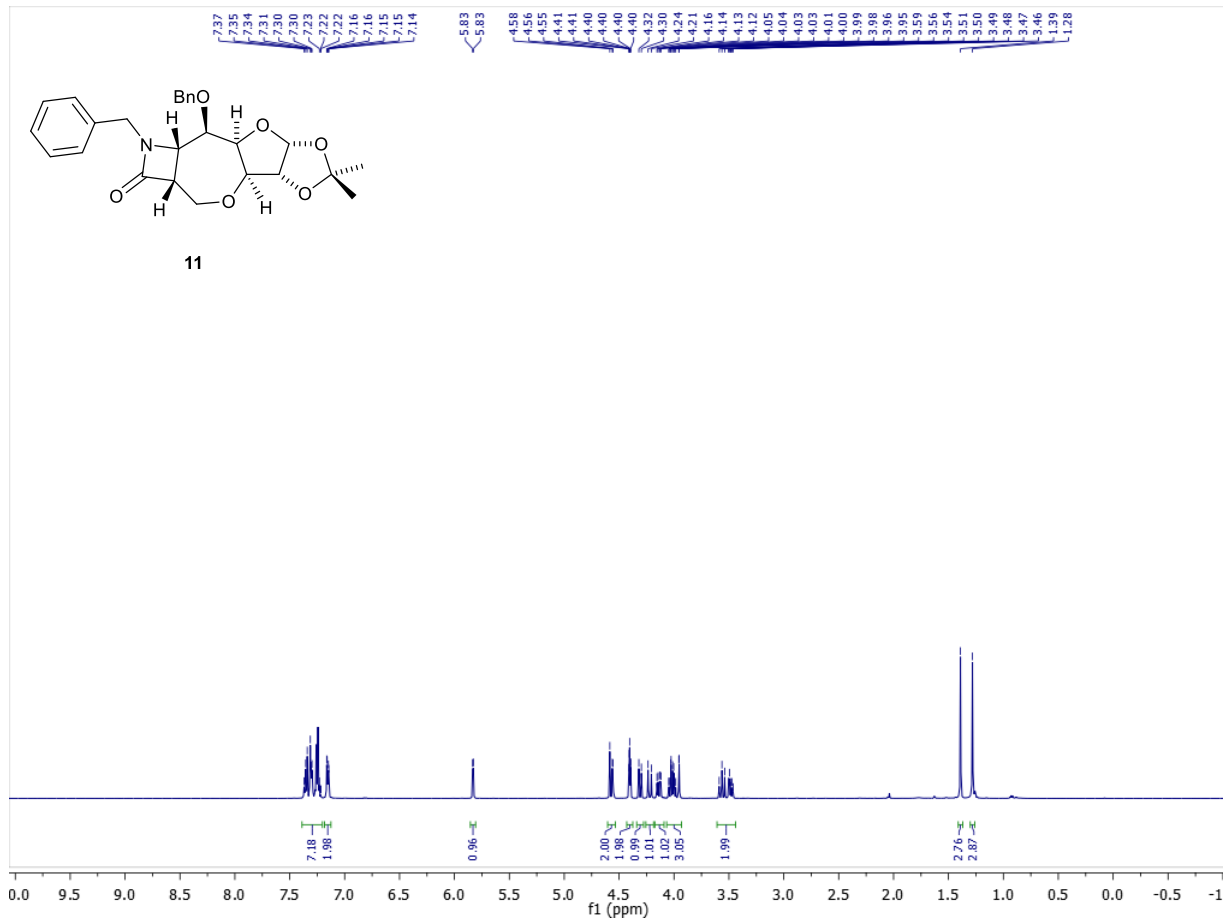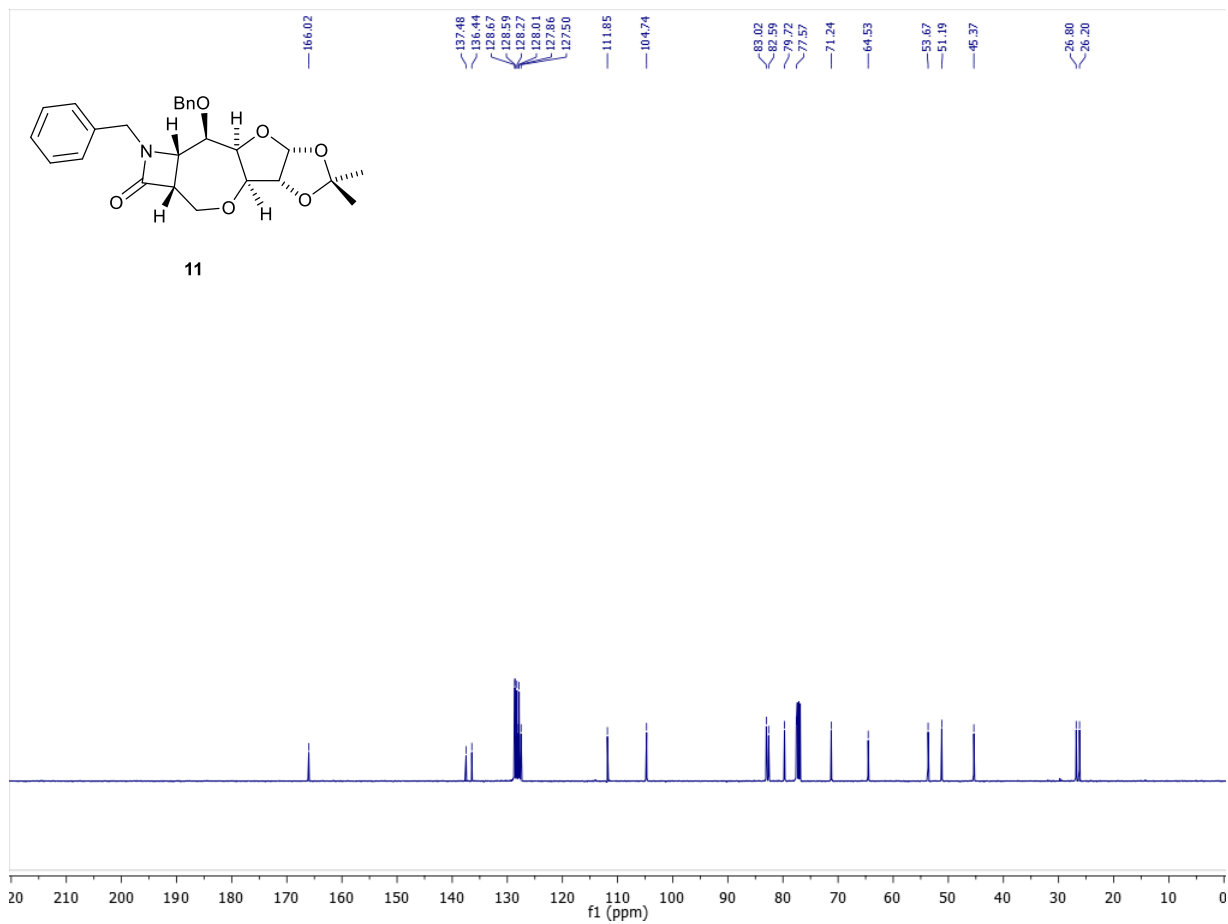

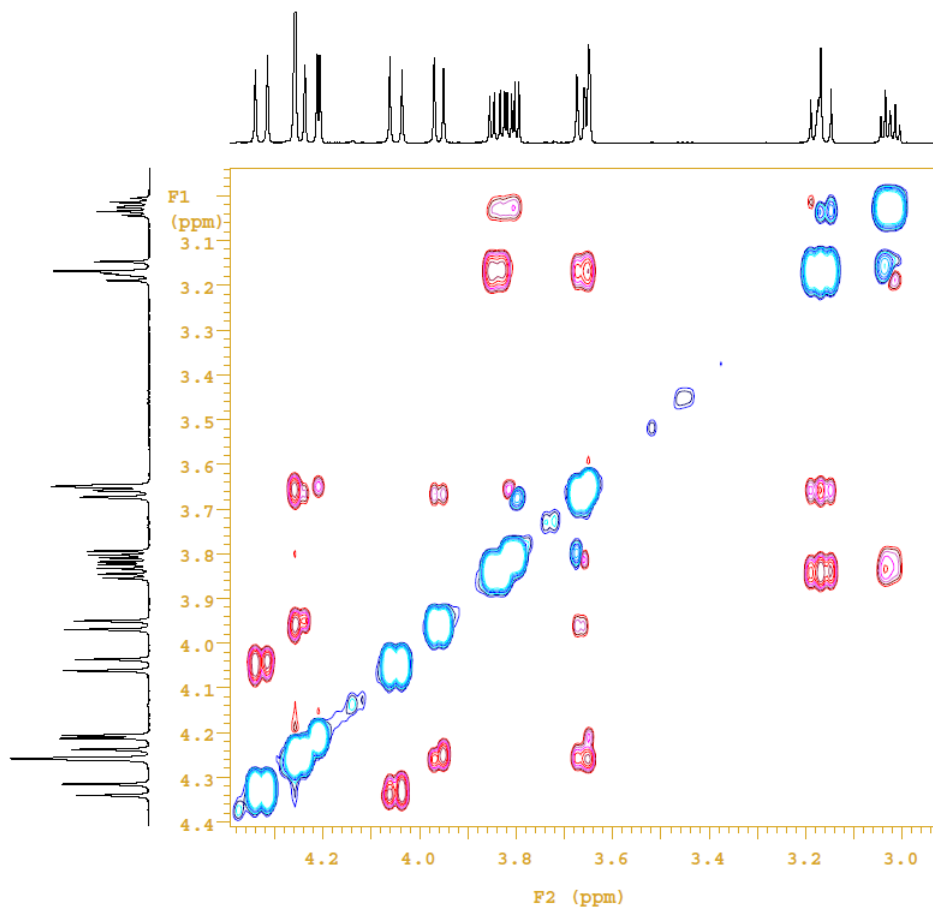

2D NOESY NMR, solvent C<sub>6</sub>D<sub>6</sub> + CD<sub>3</sub>OD

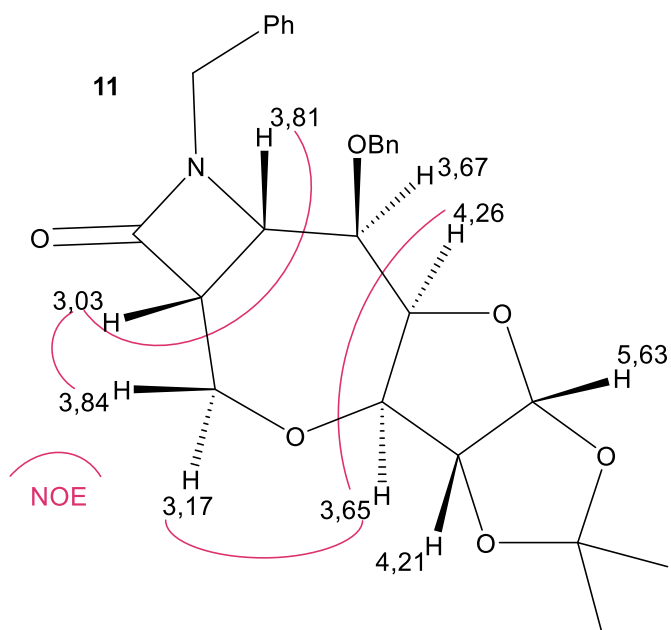



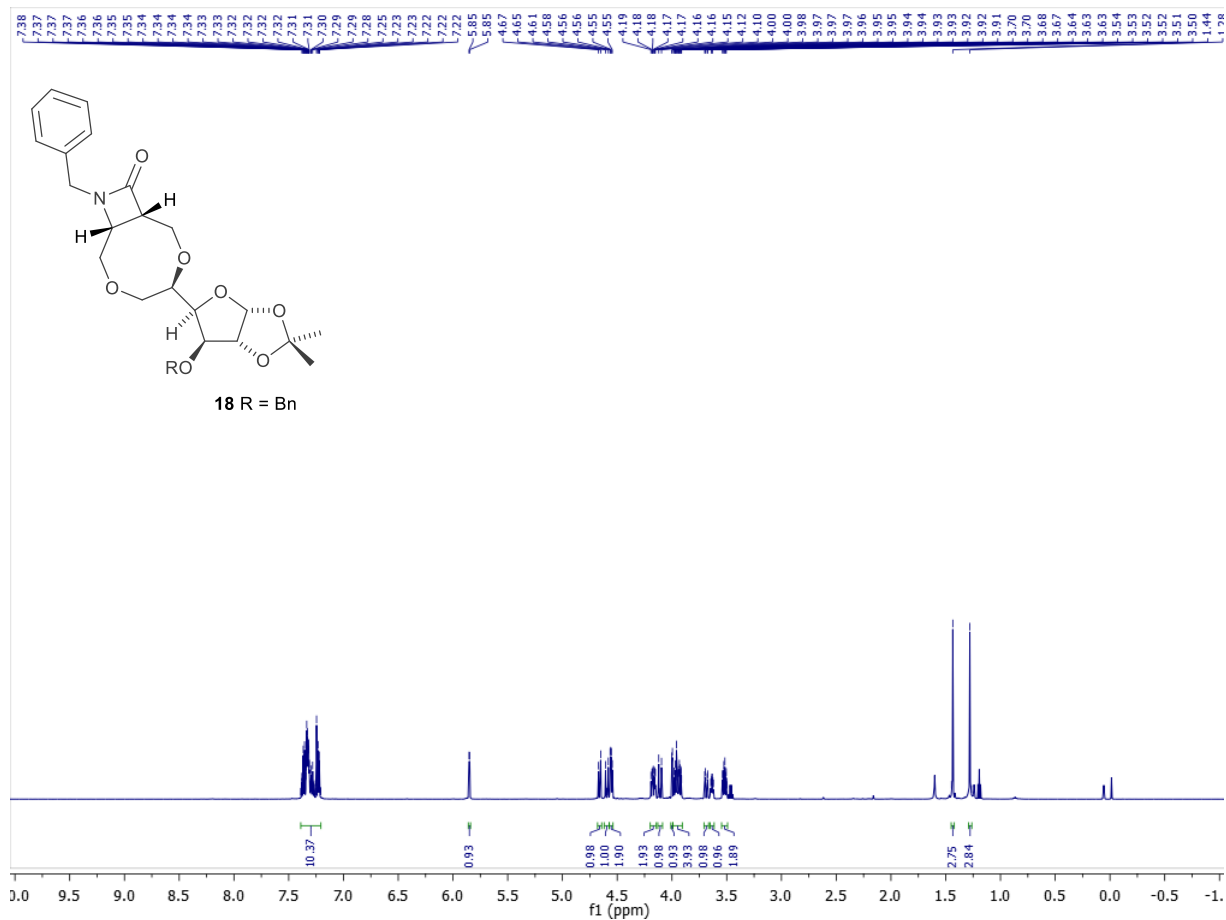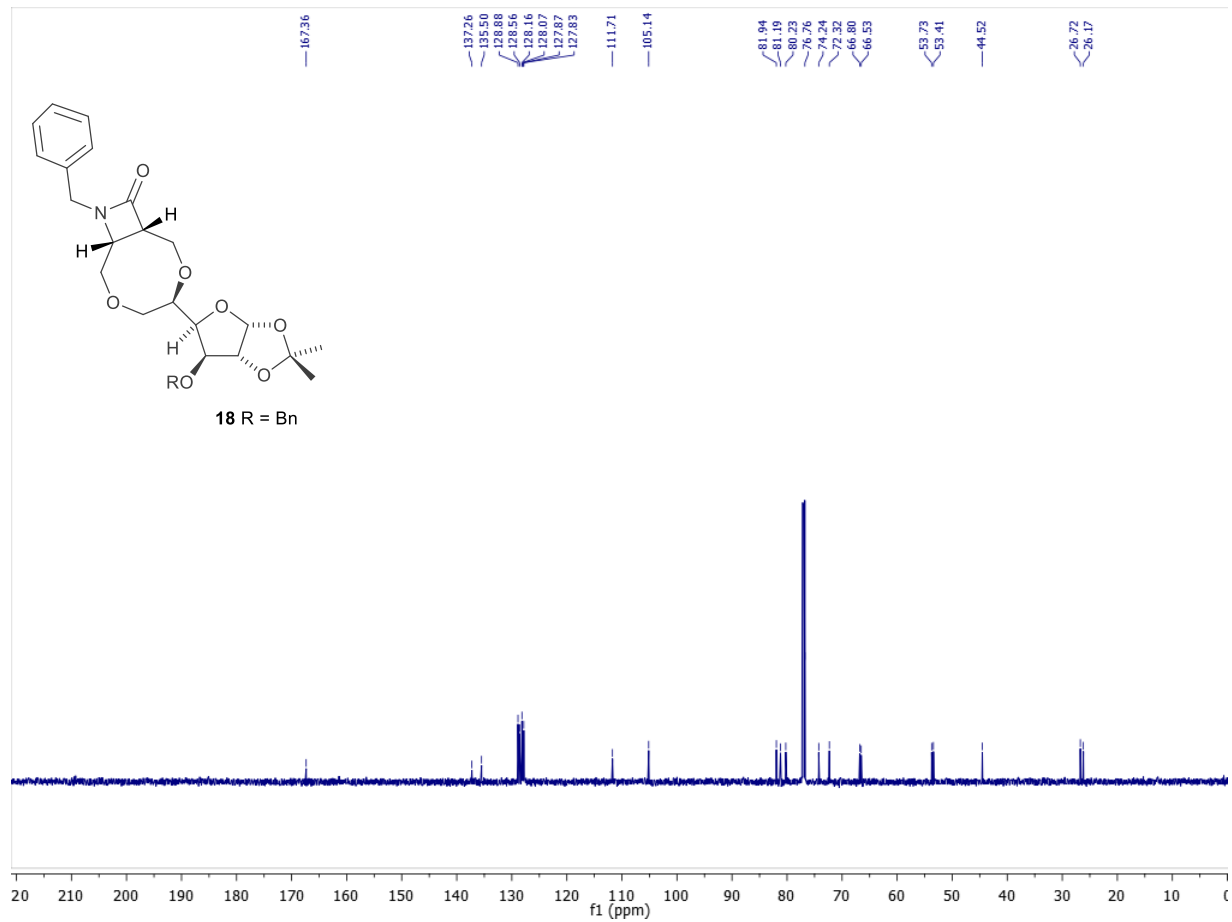

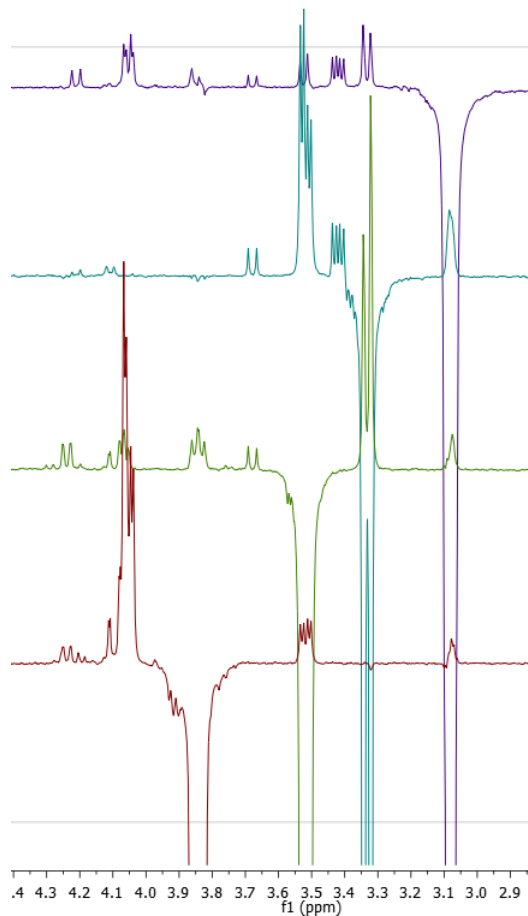

1D NOESY NMR, solvent  $C_6D_6$

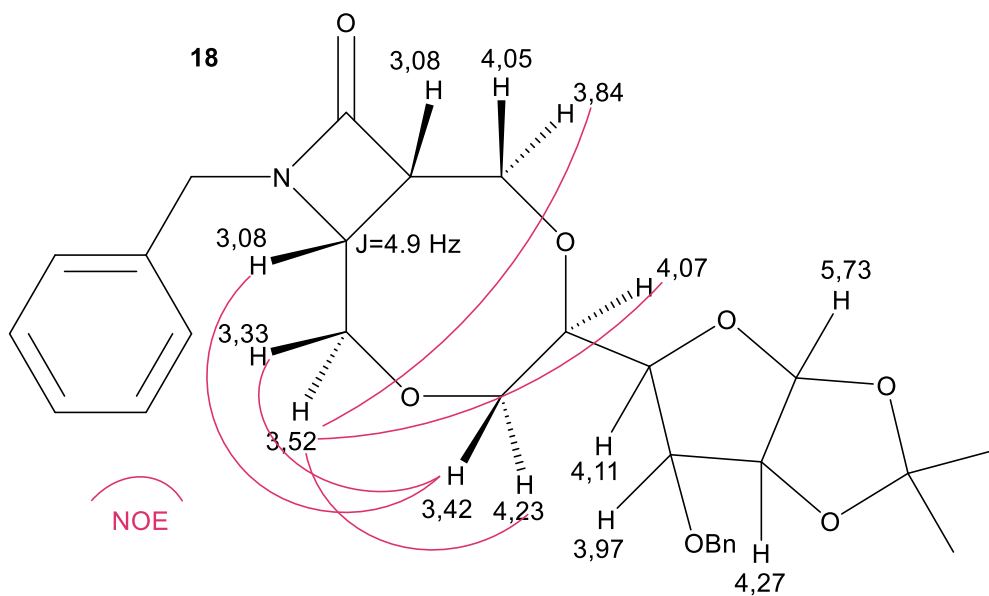

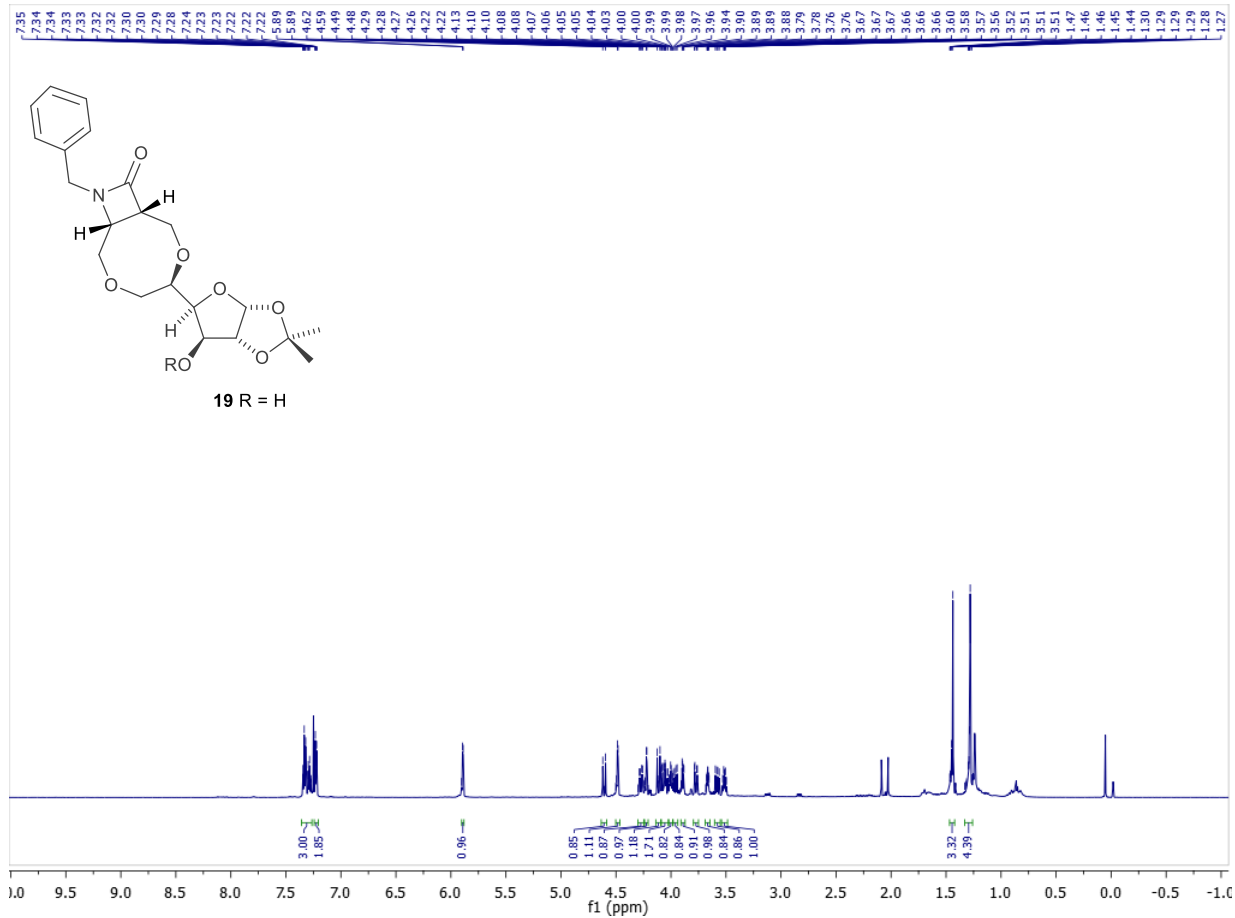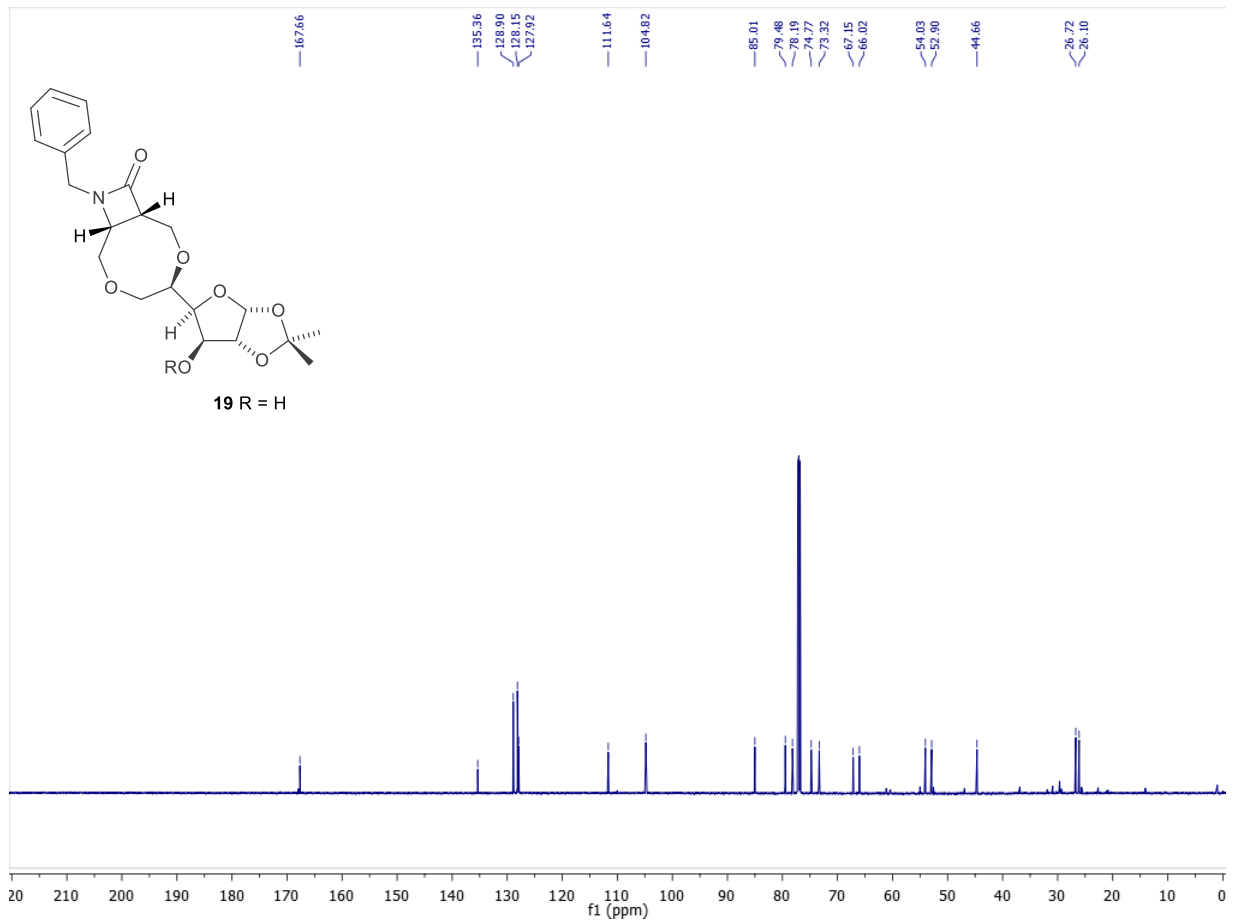

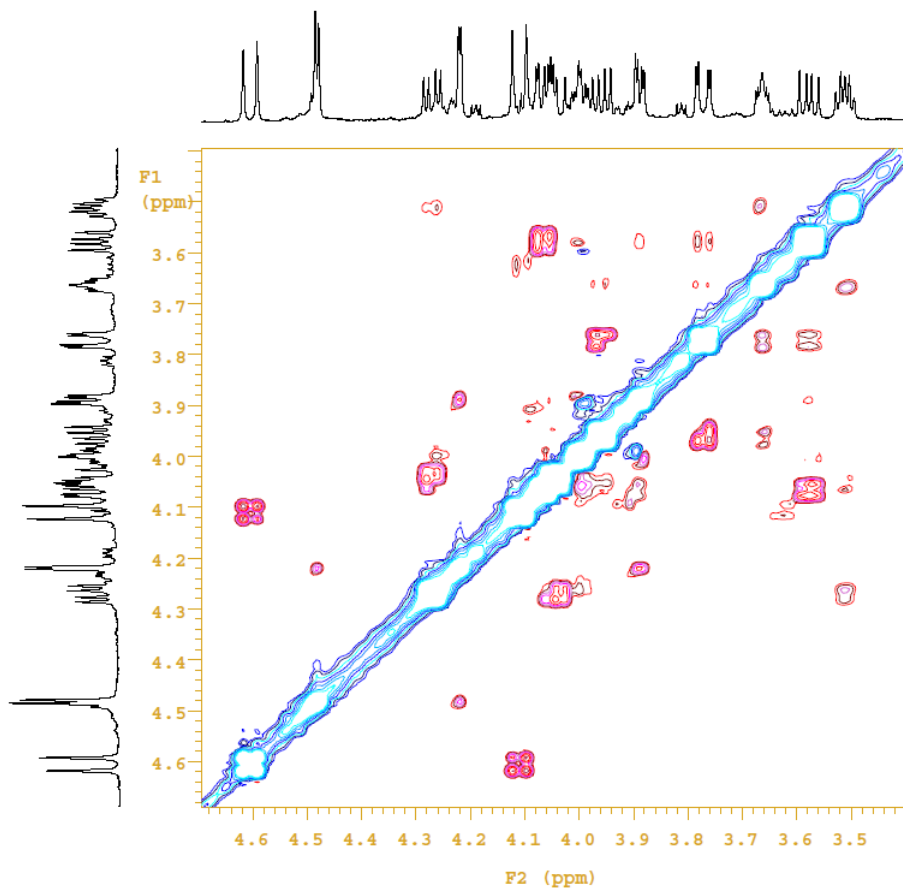

2D NOESY NMR, solvent  $\text{CDCl}_3$

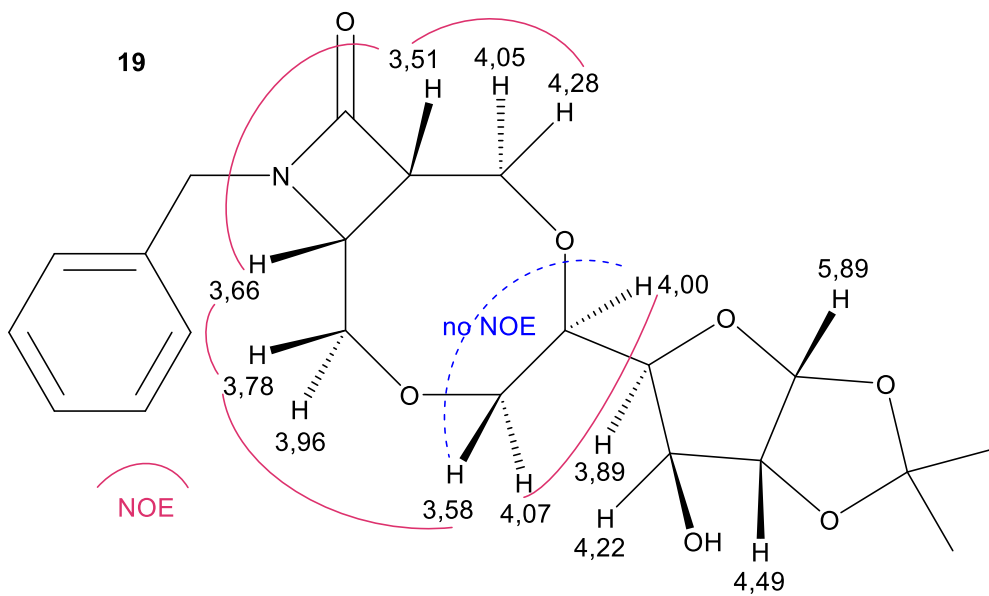

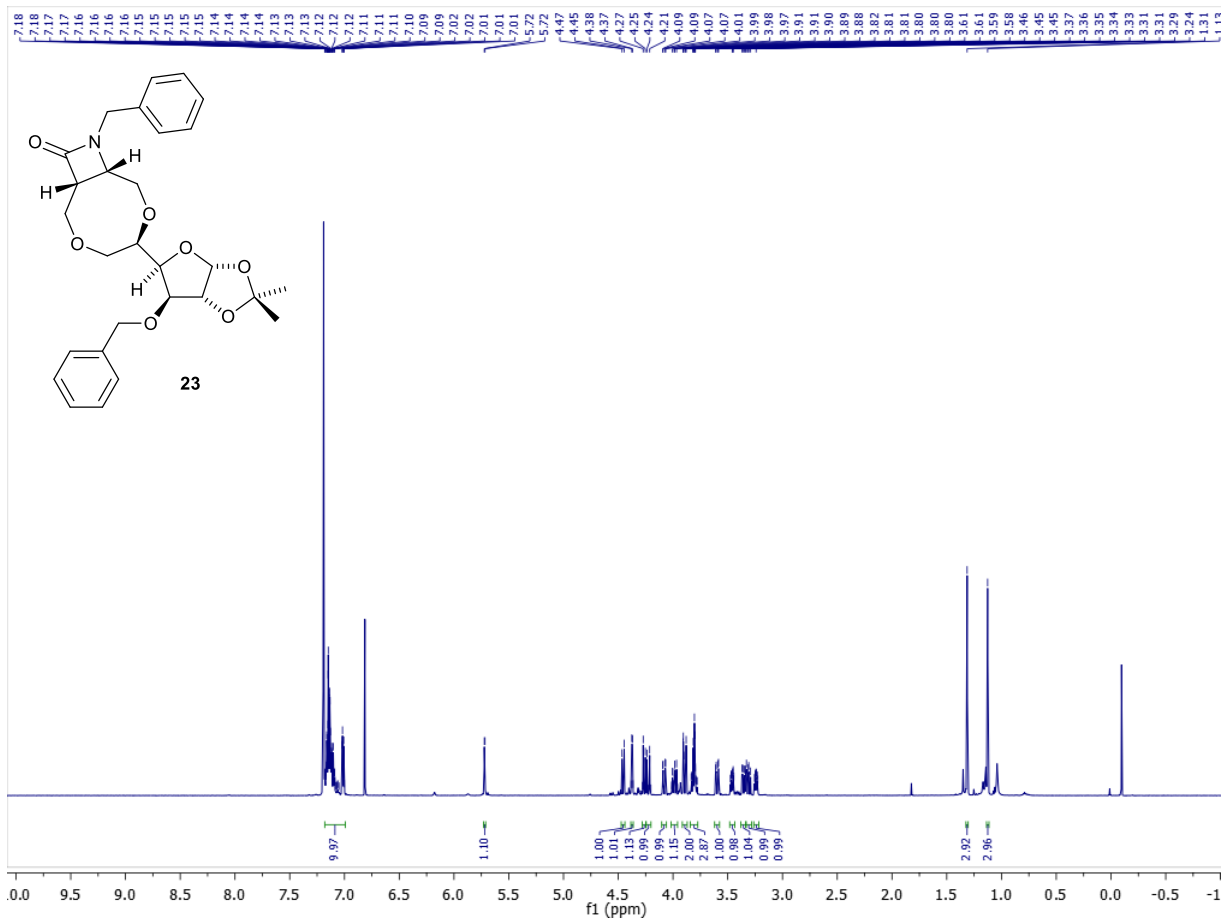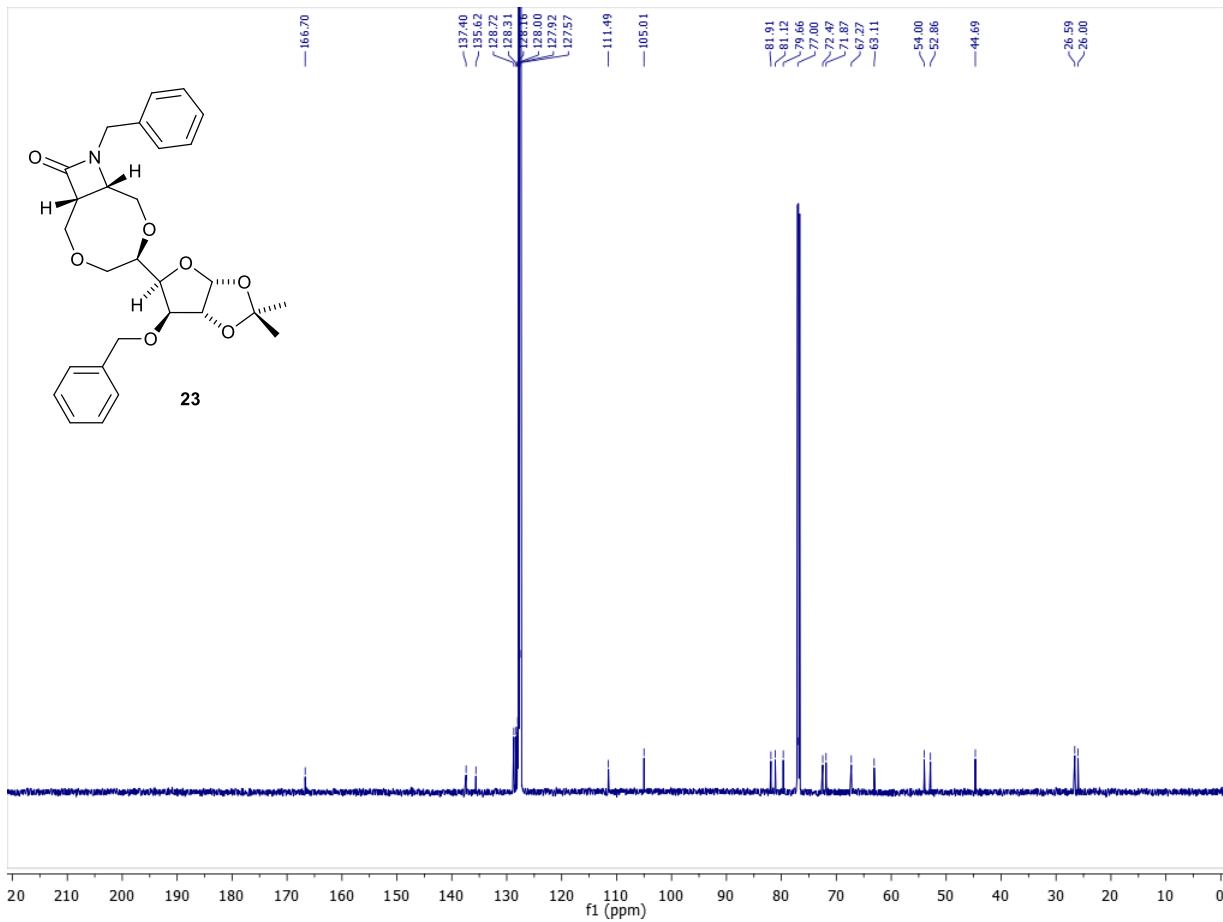

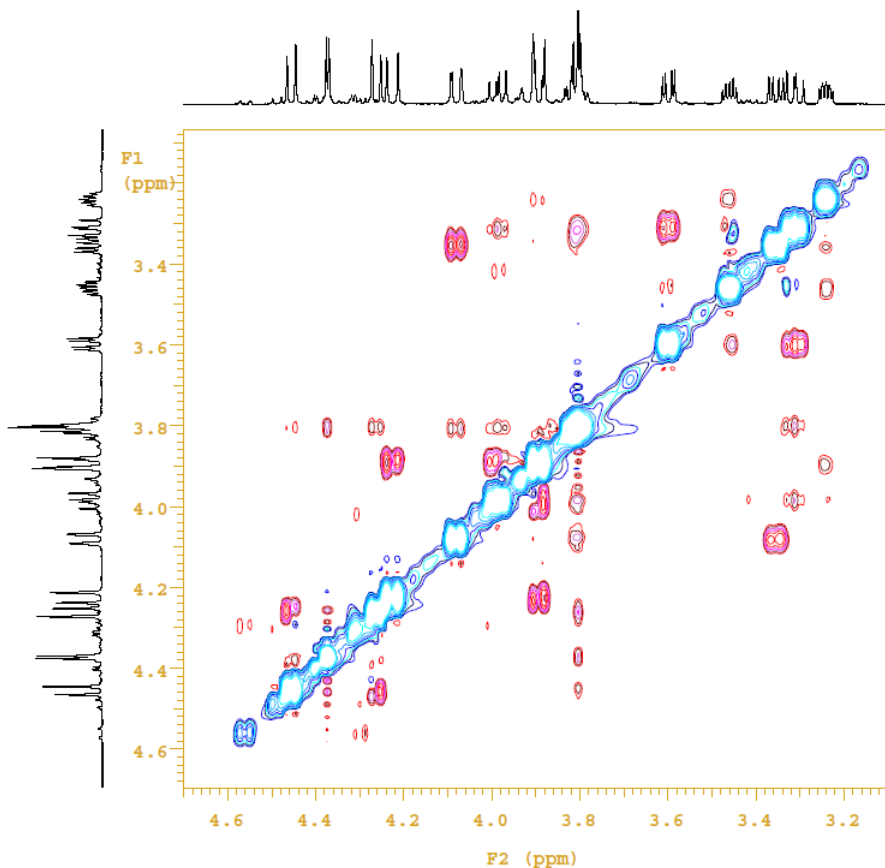

2D NOESY NMR, solvent  $\text{CDCl}_3 + \text{C}_6\text{D}_6$

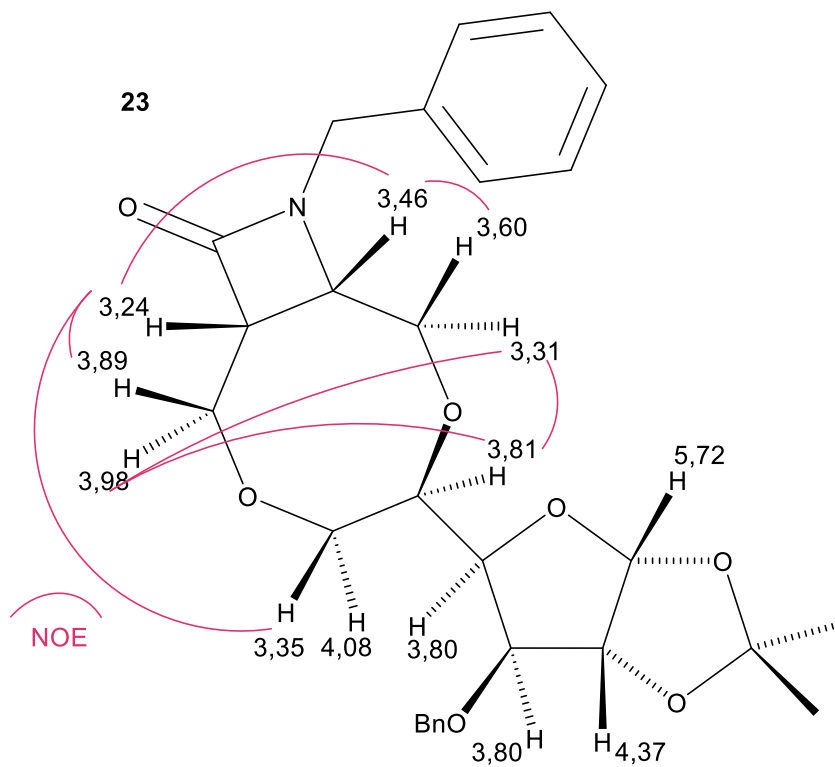

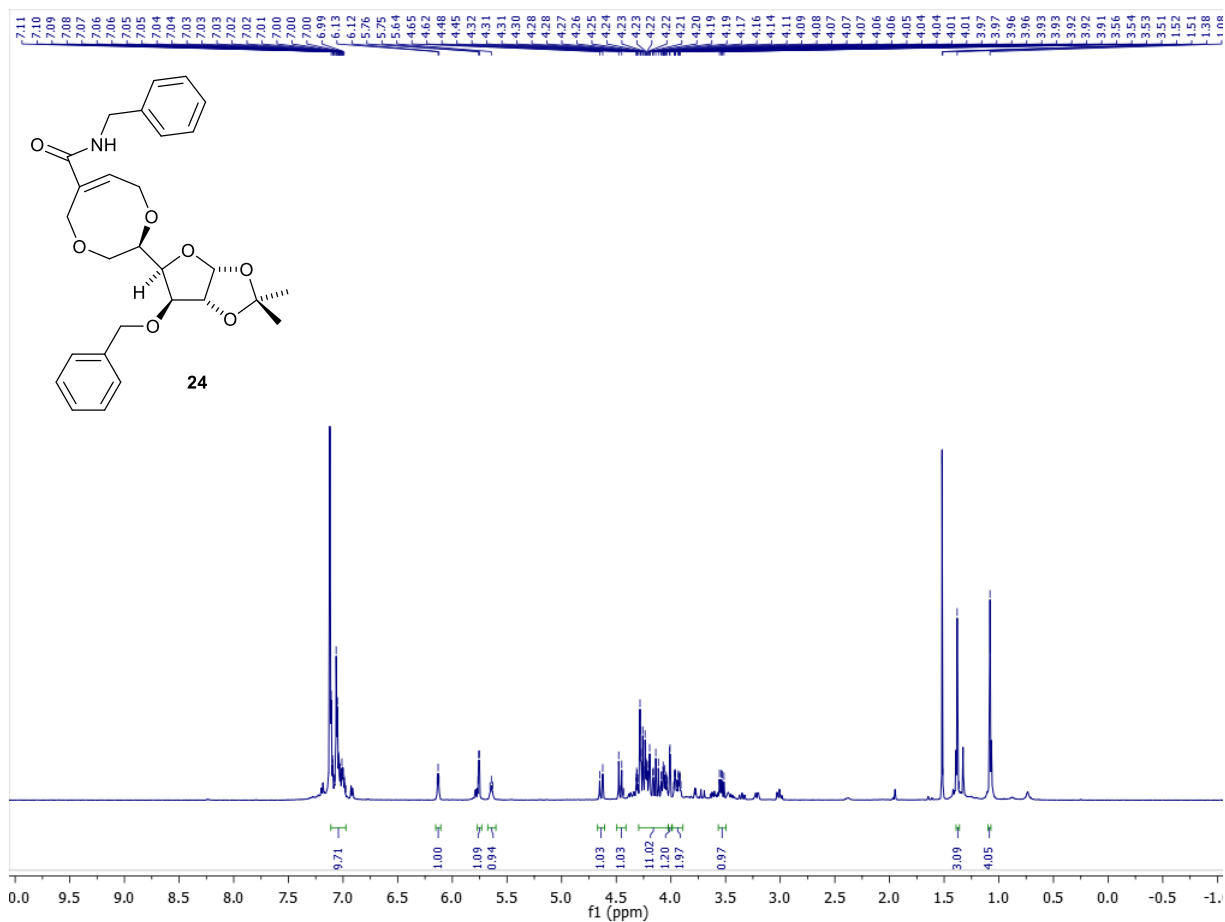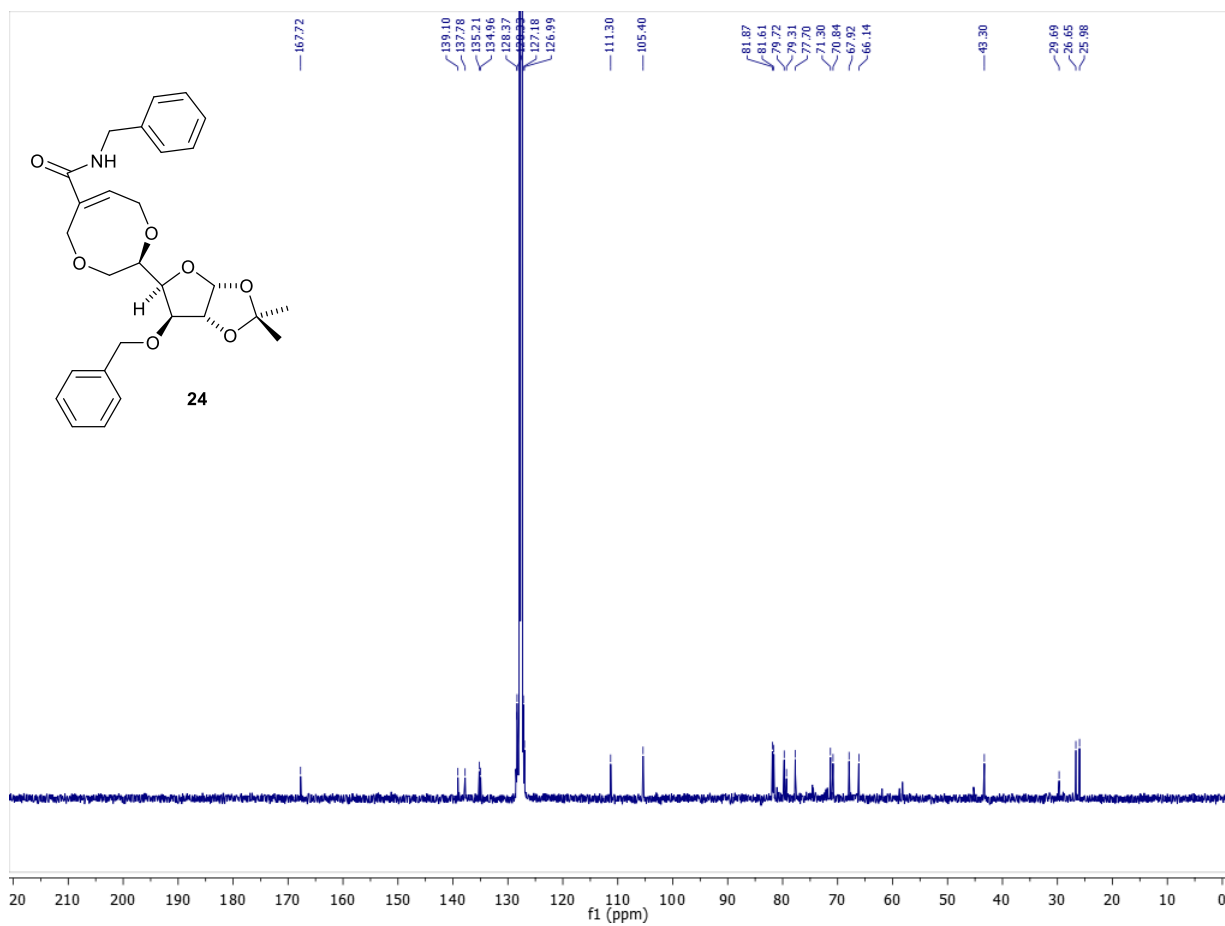

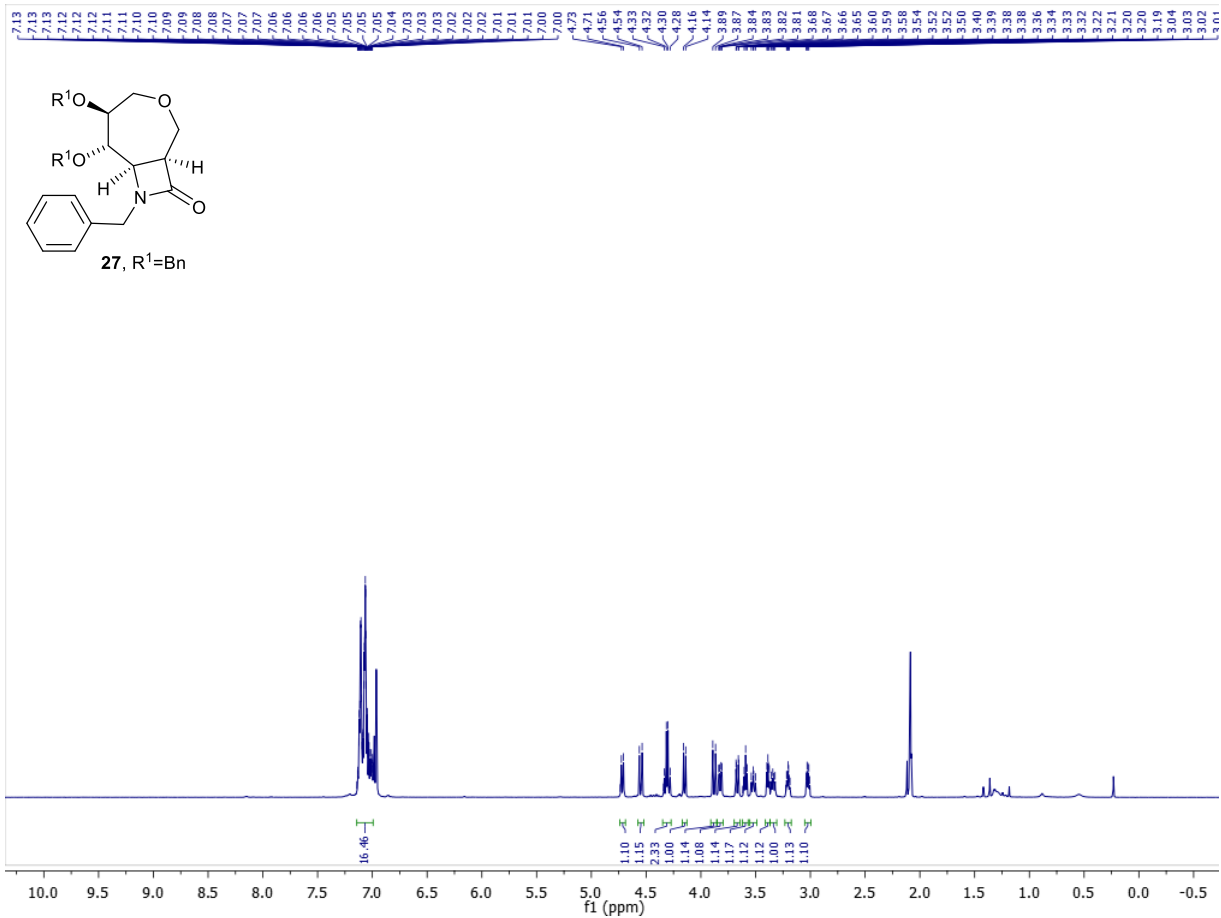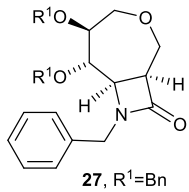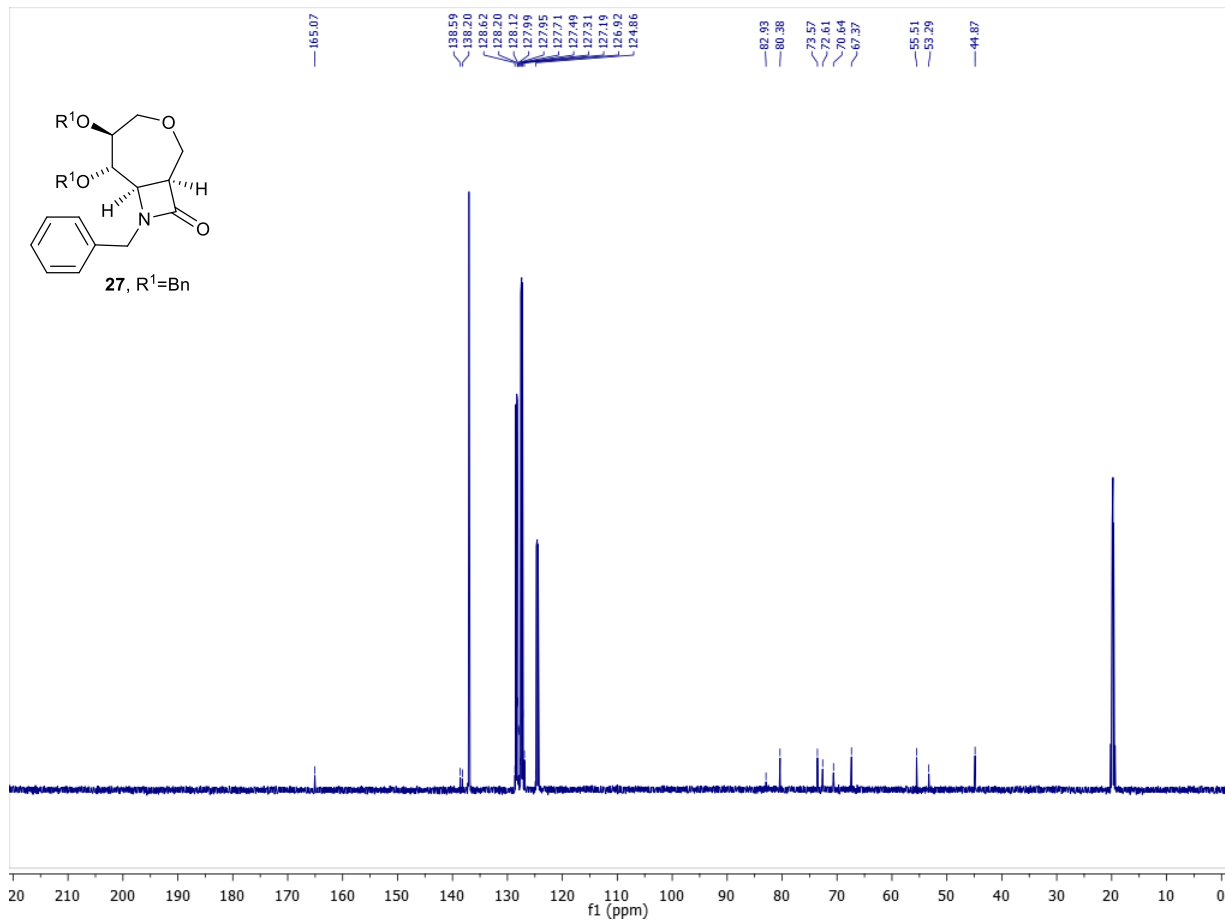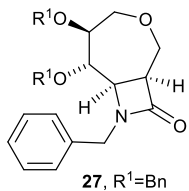



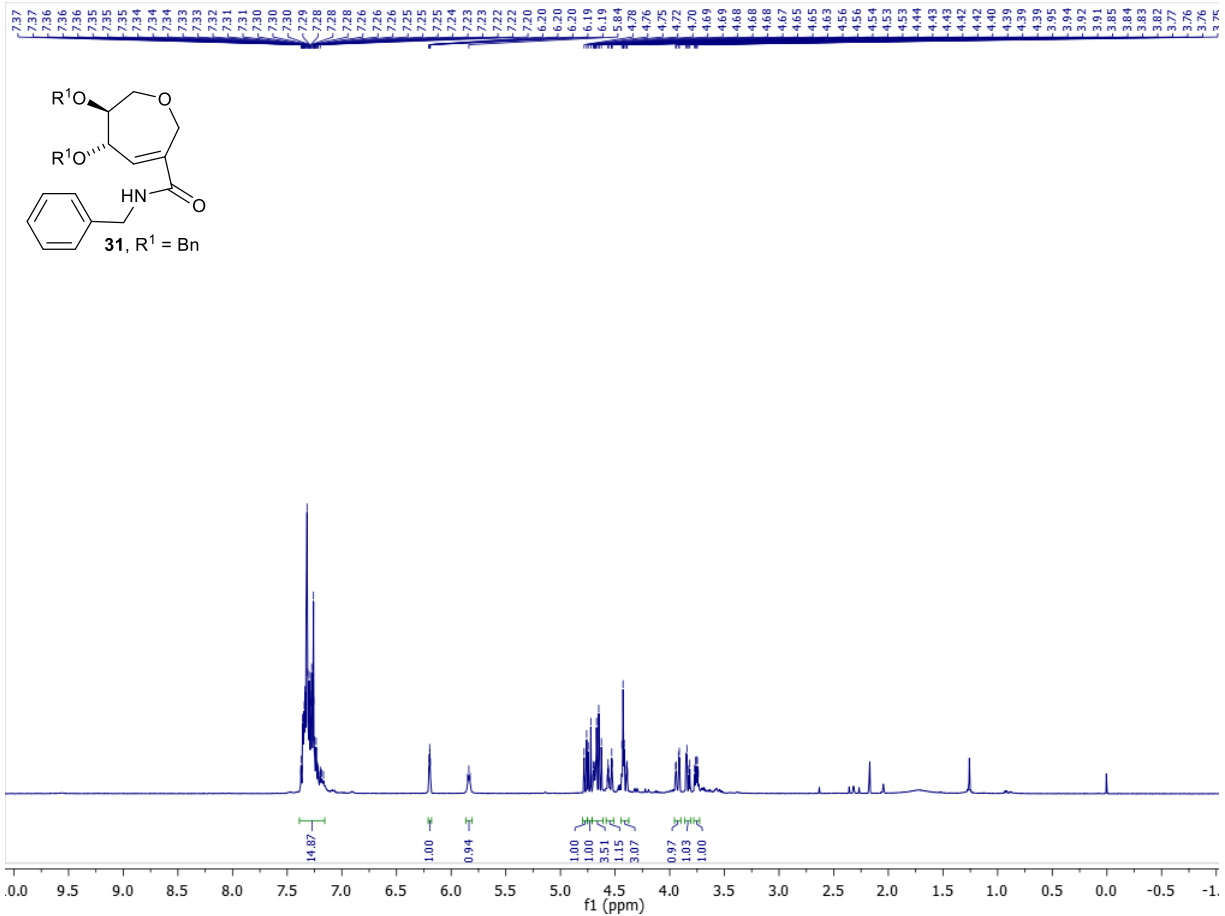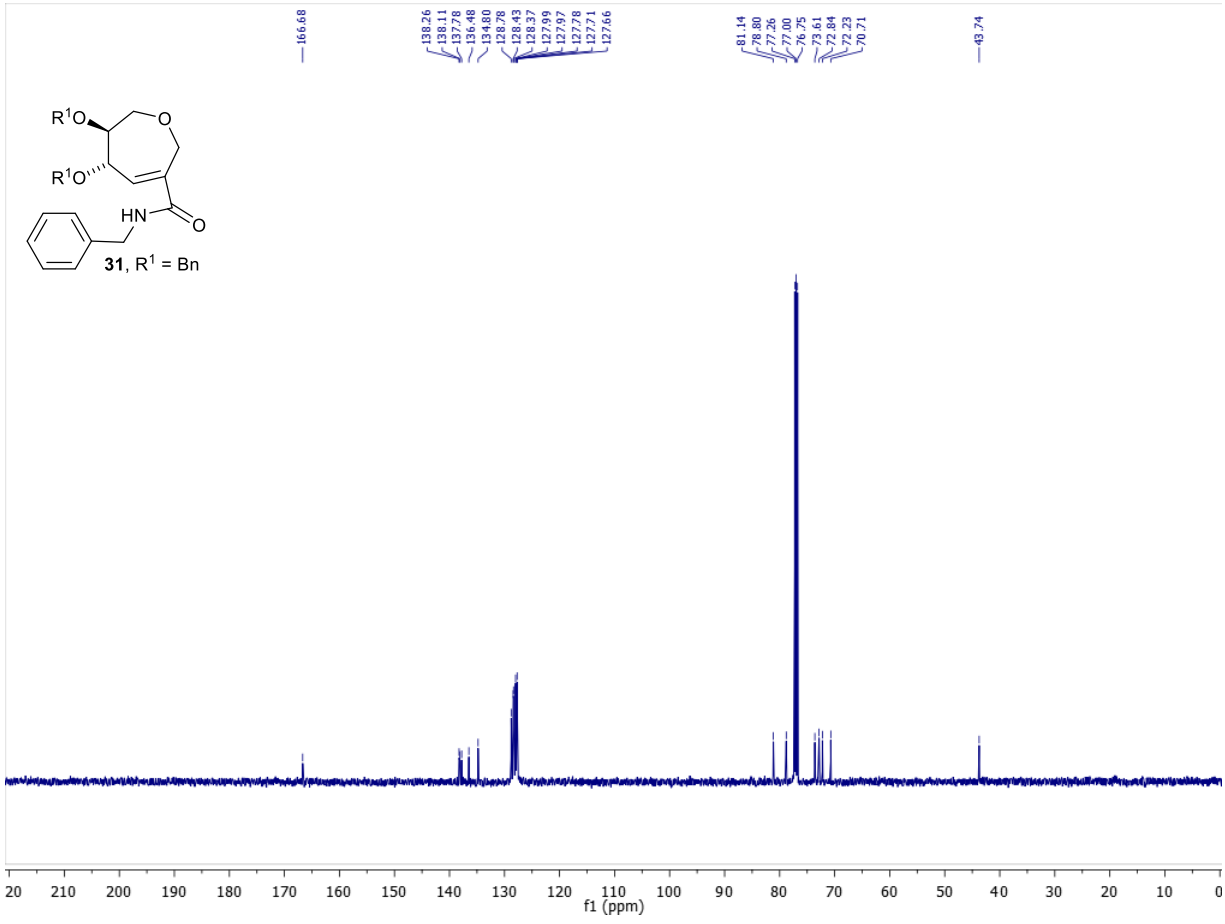

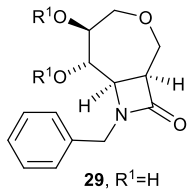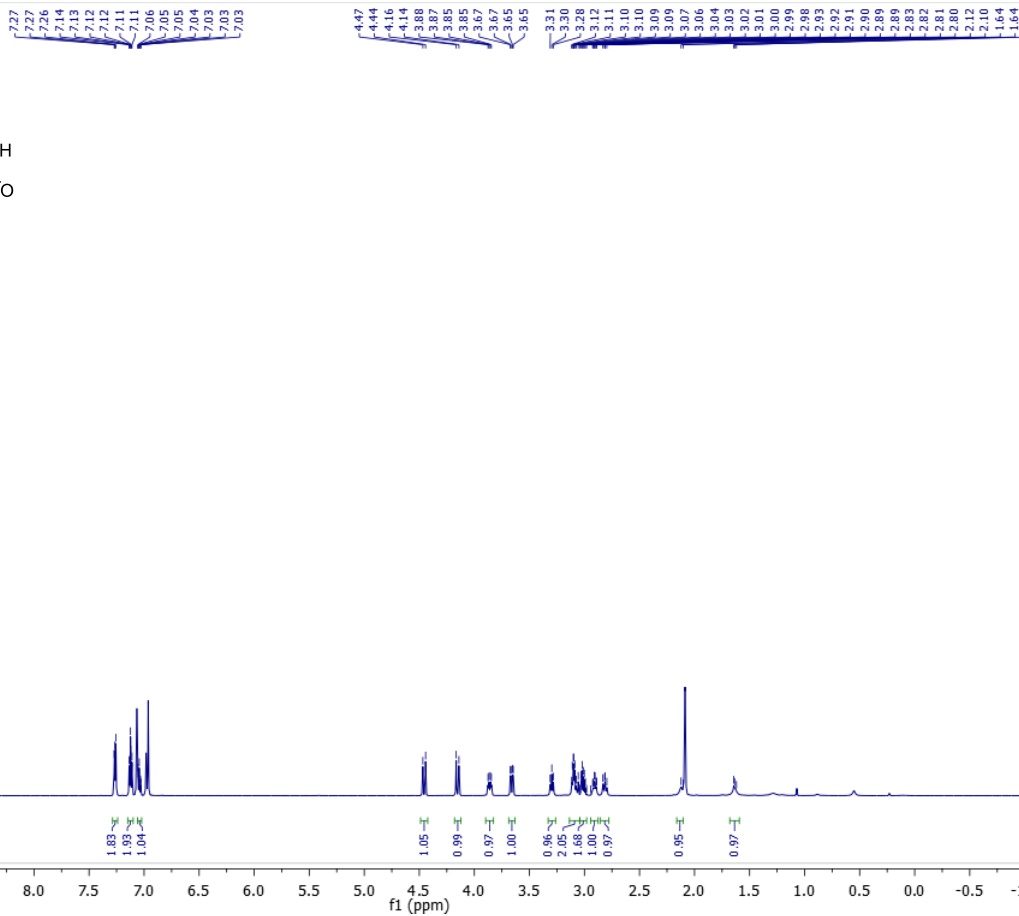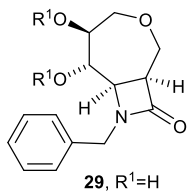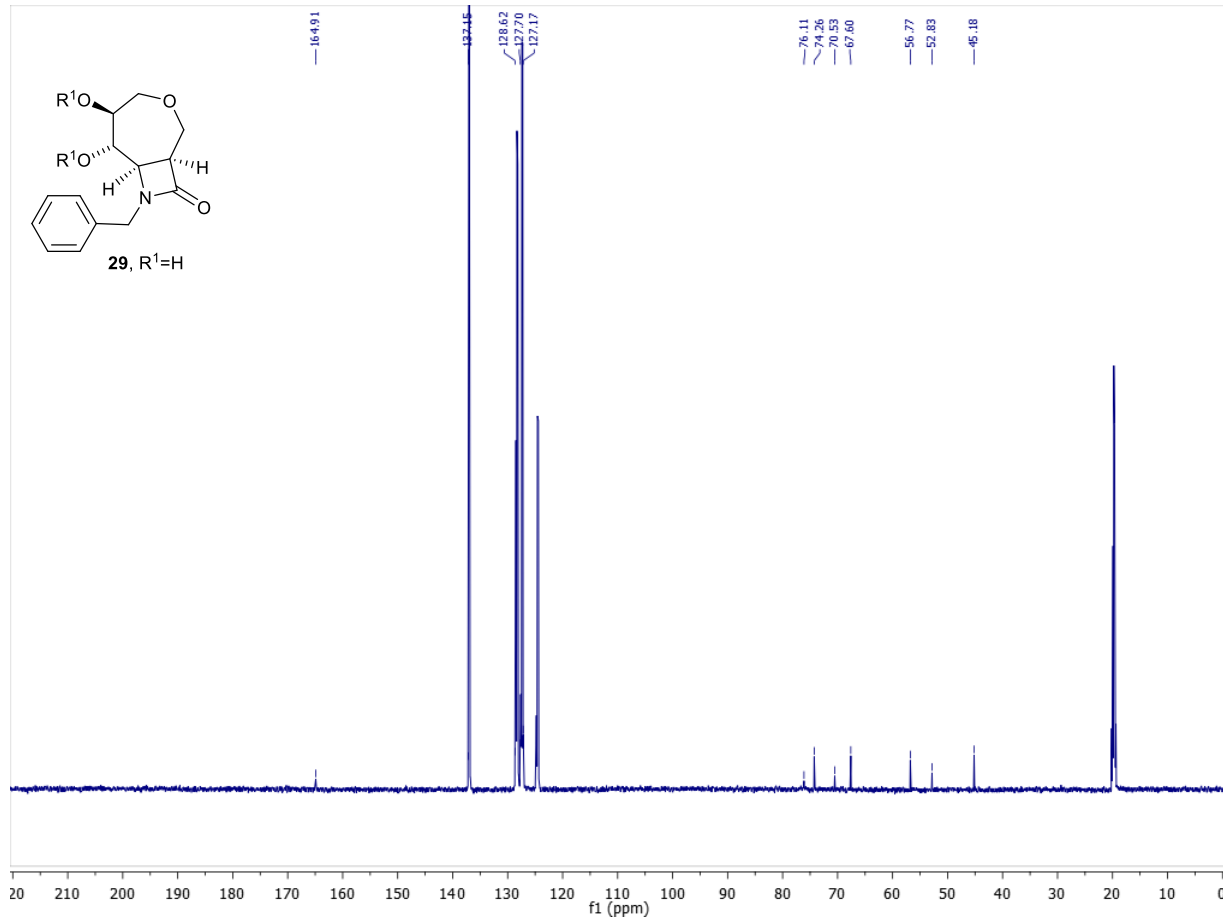

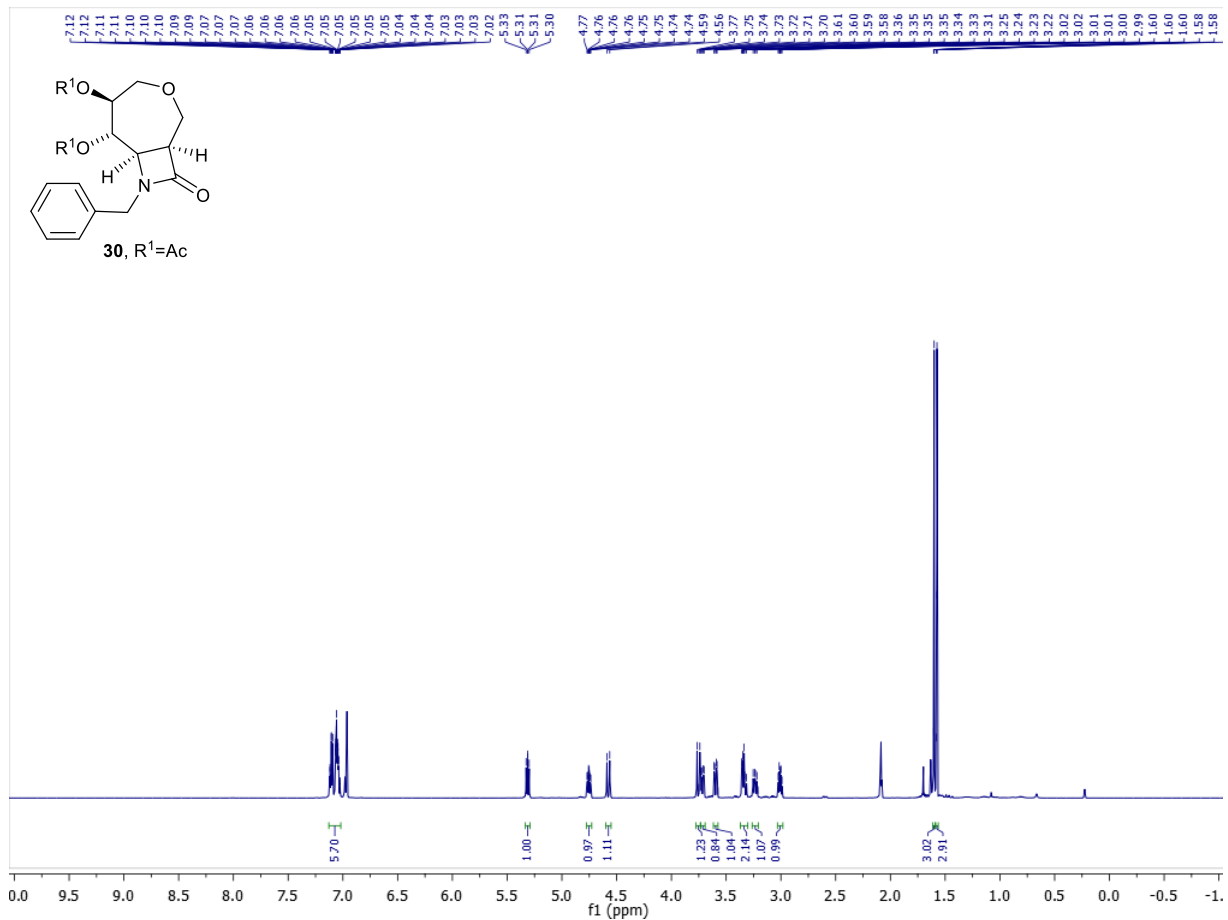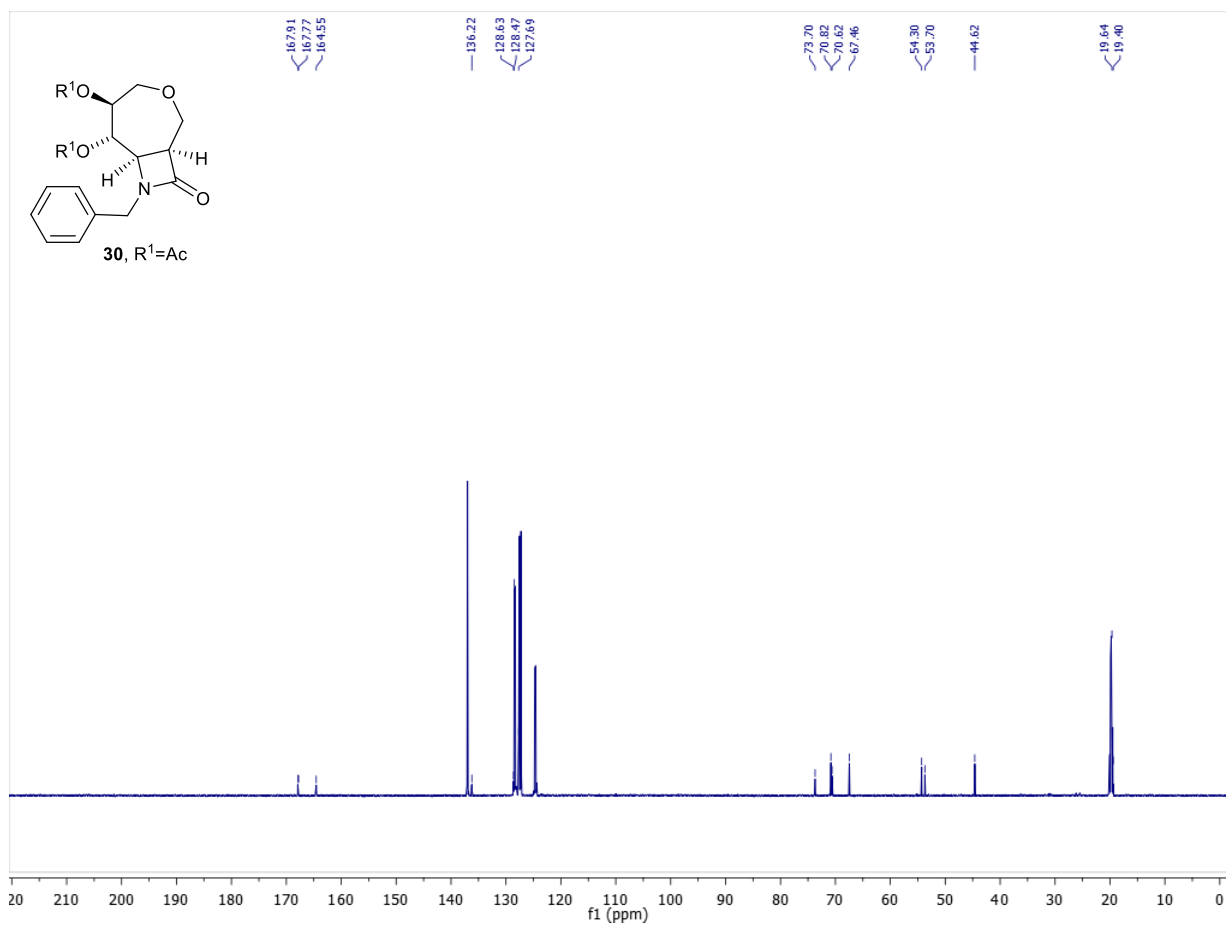

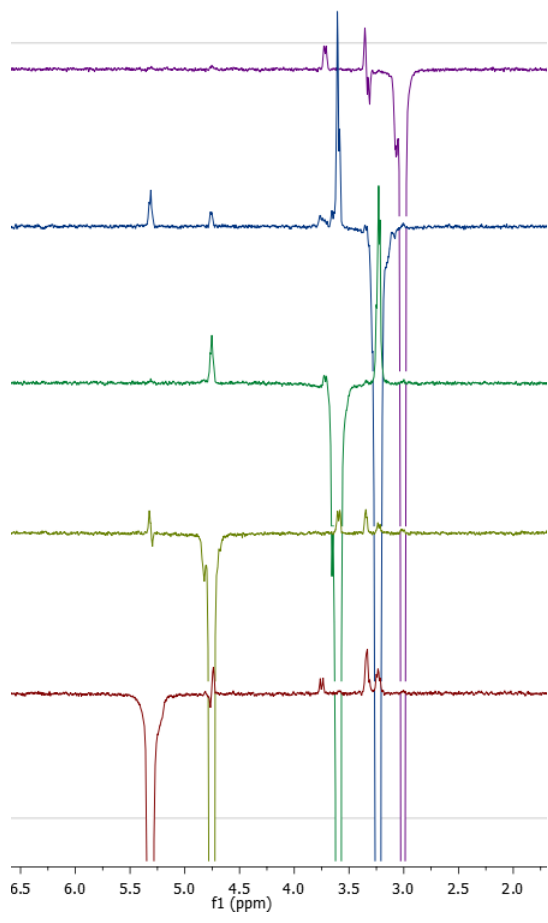

1D NOESY NMR, solvent toluene 80 °C

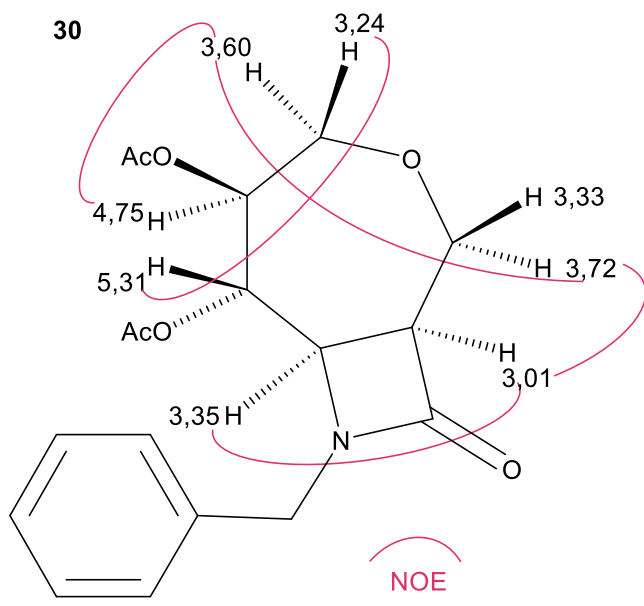

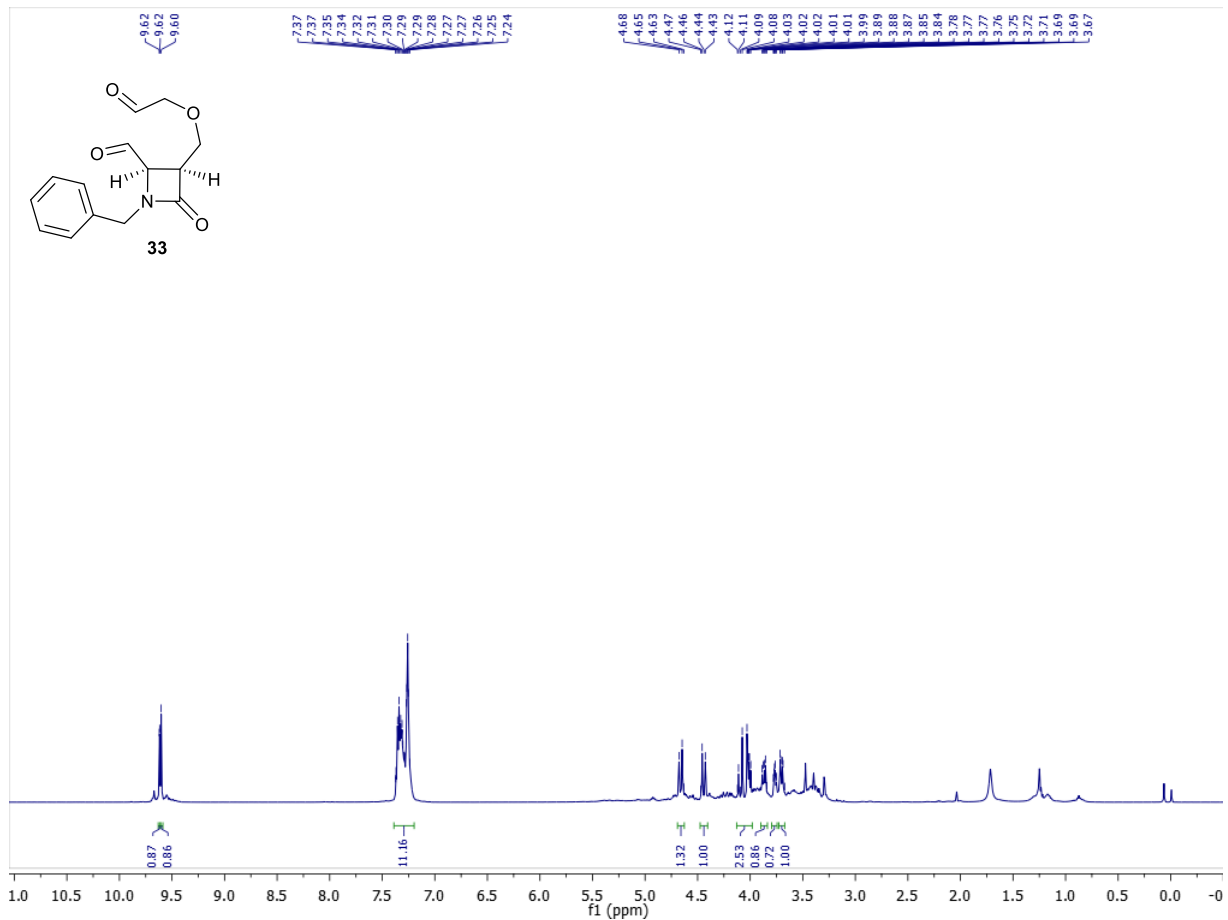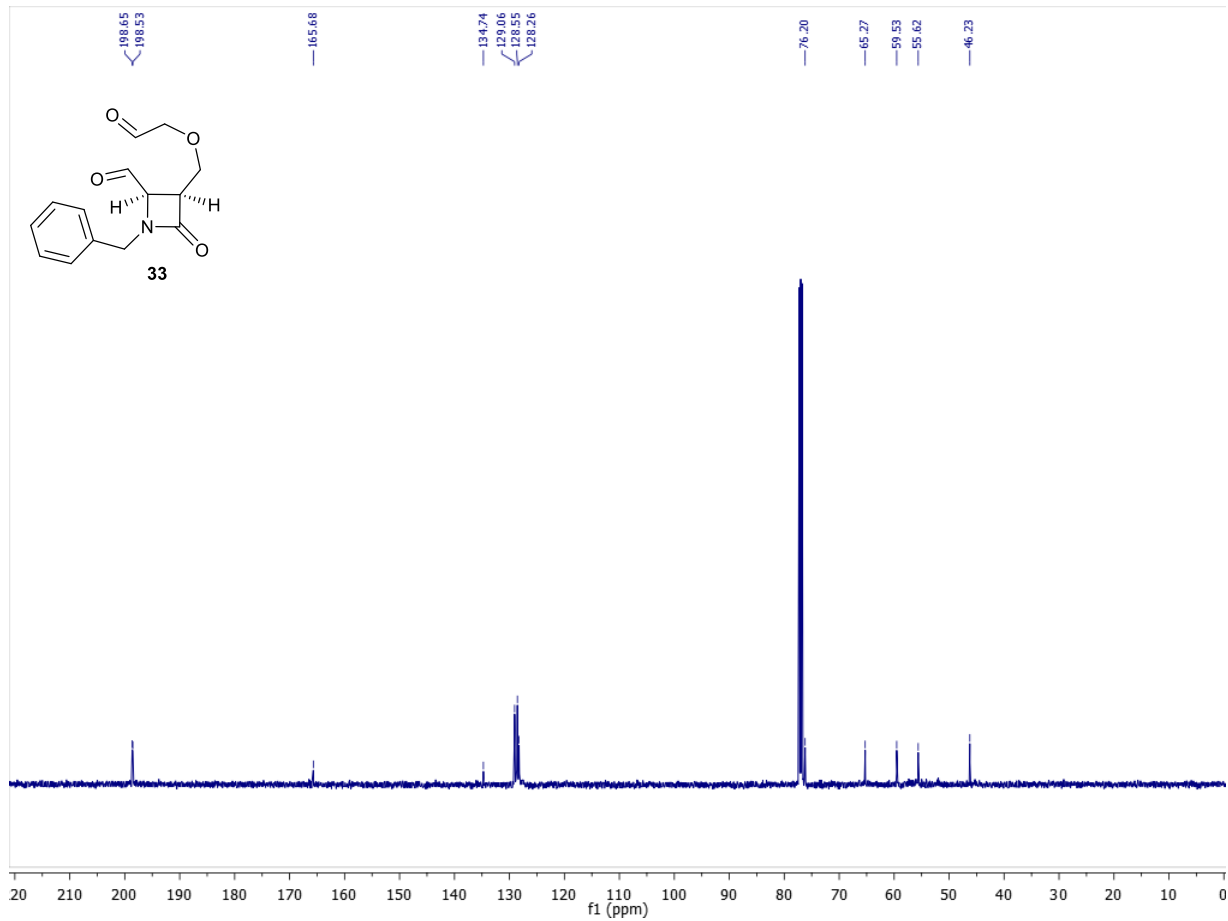

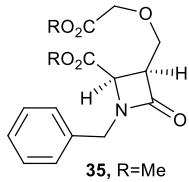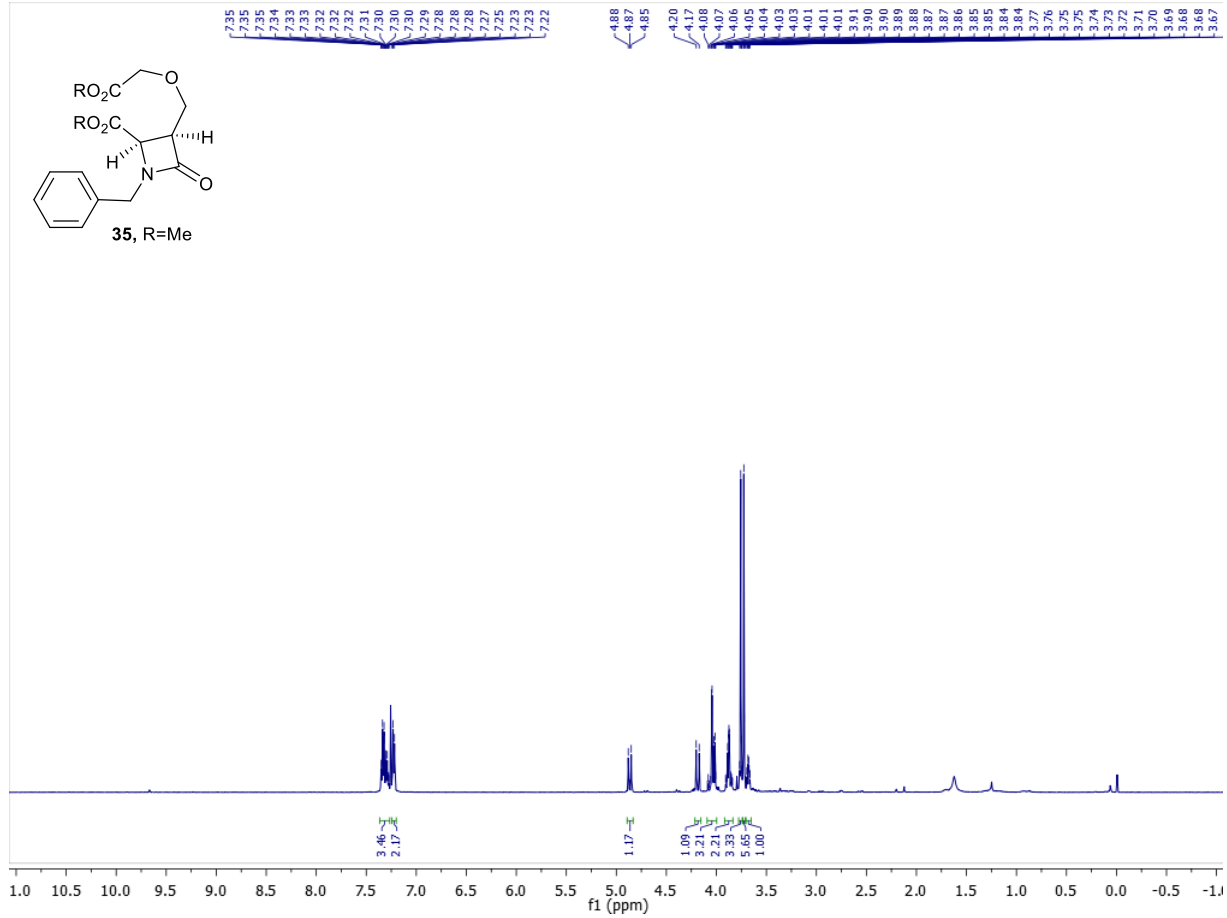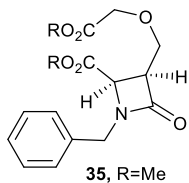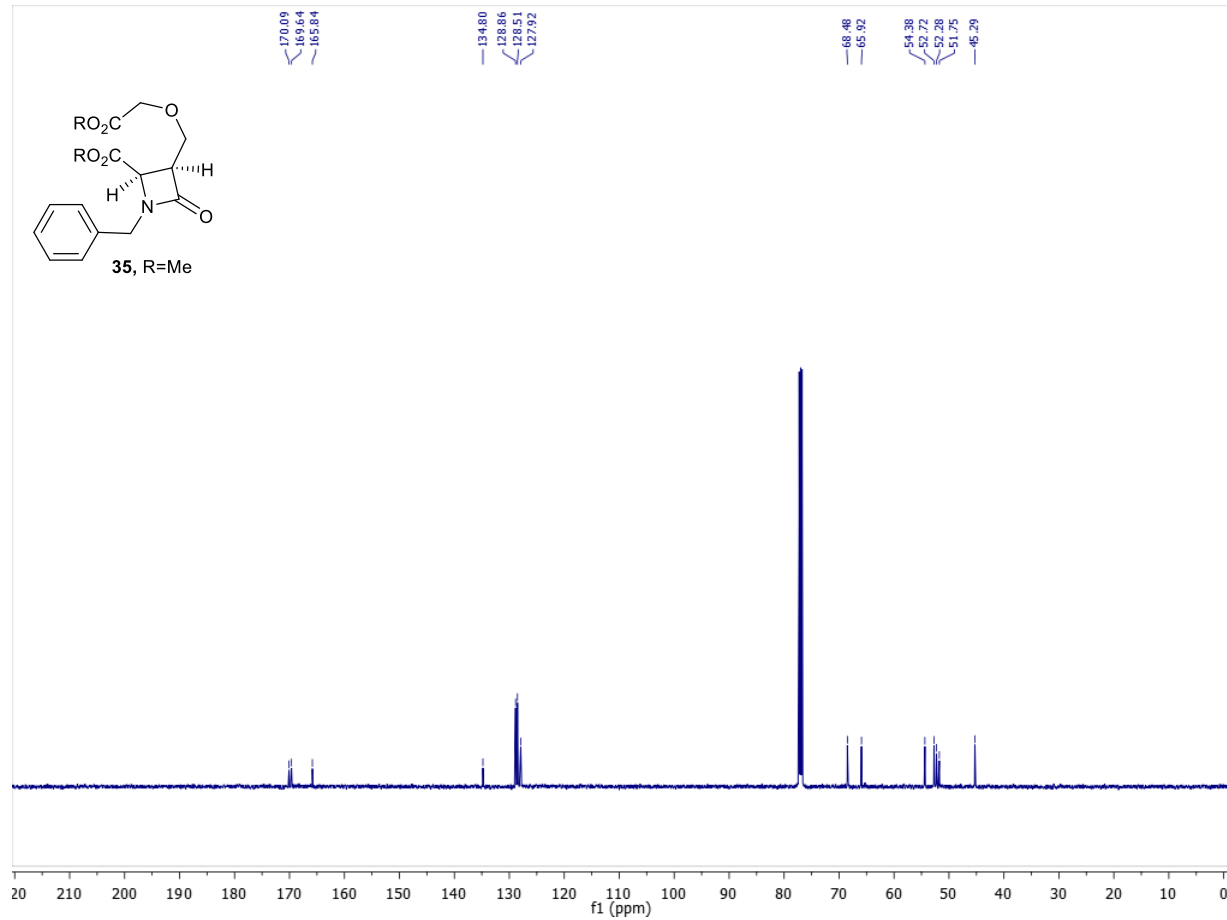

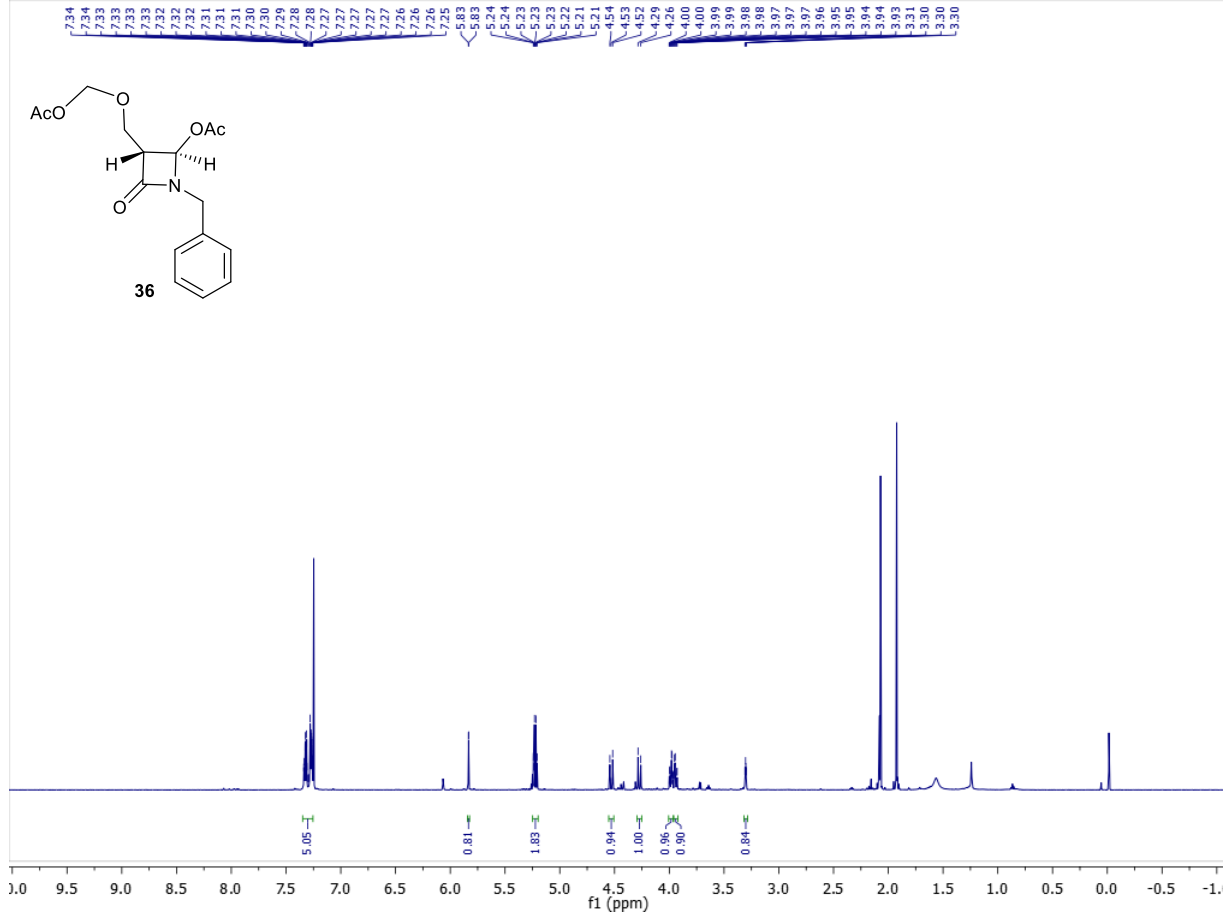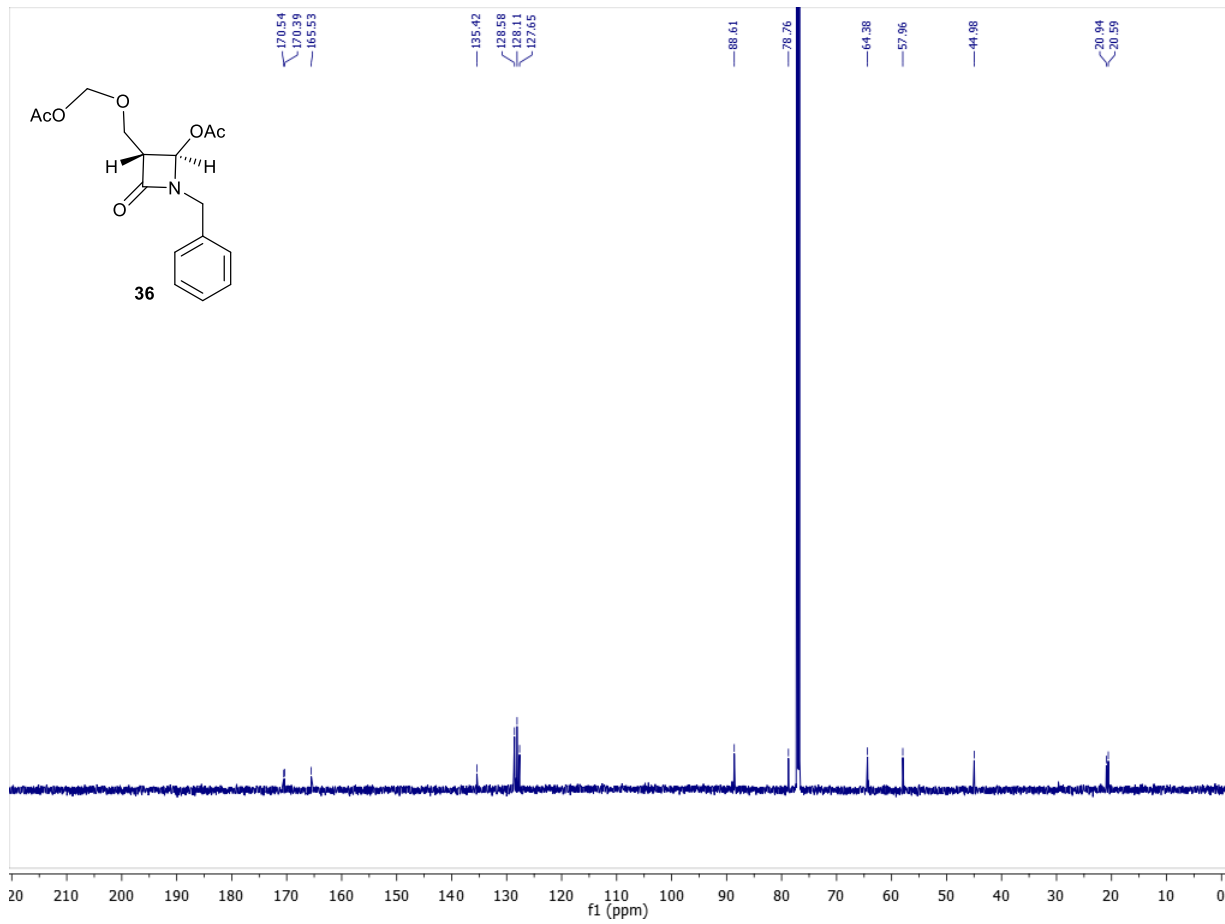

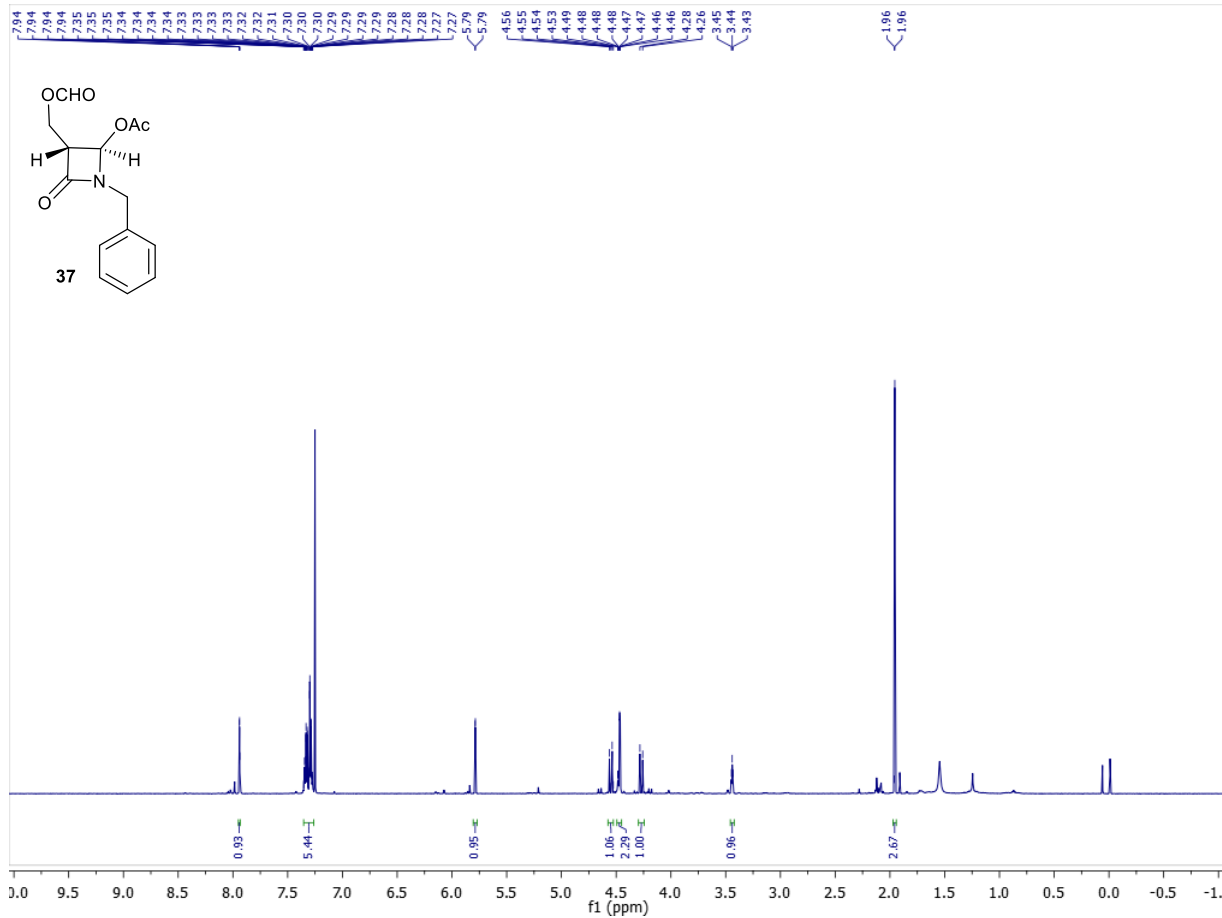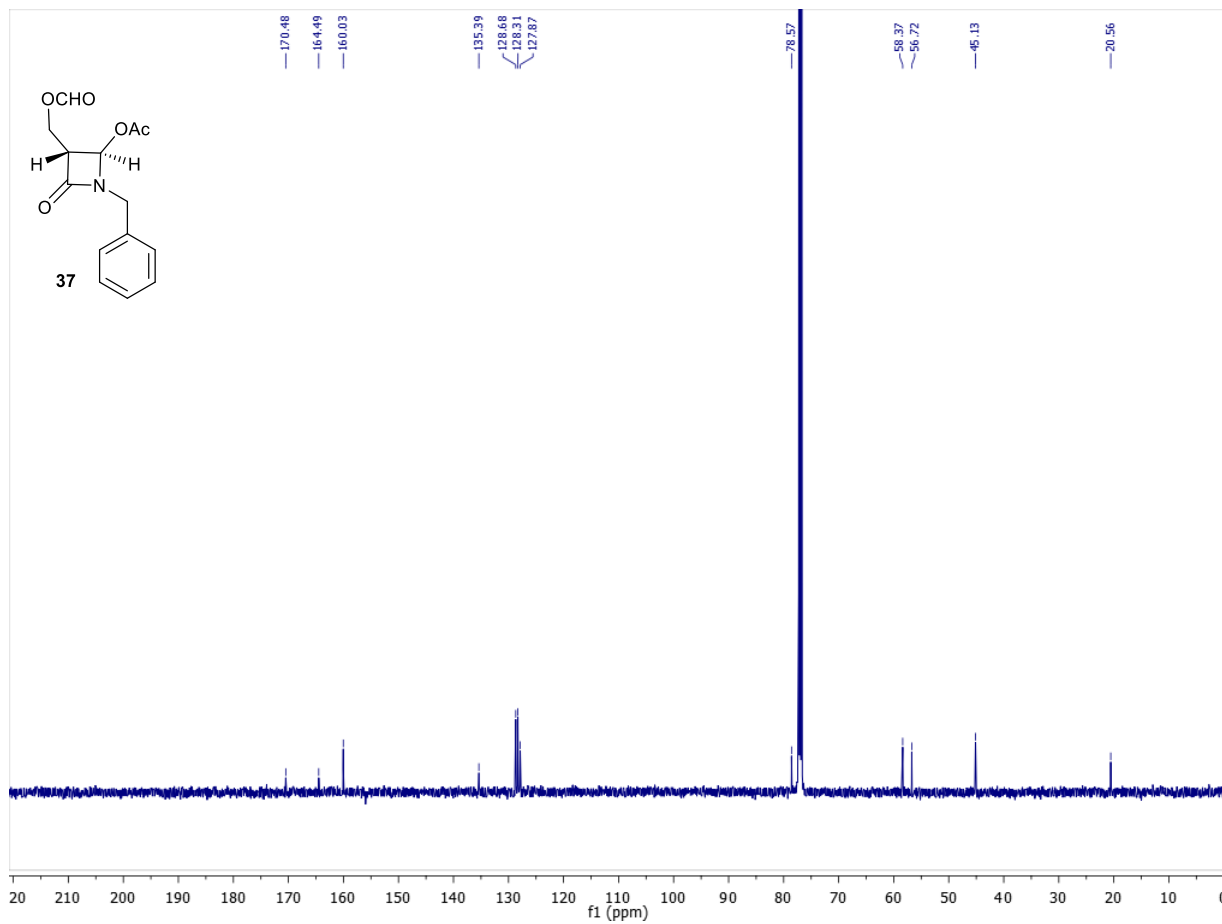



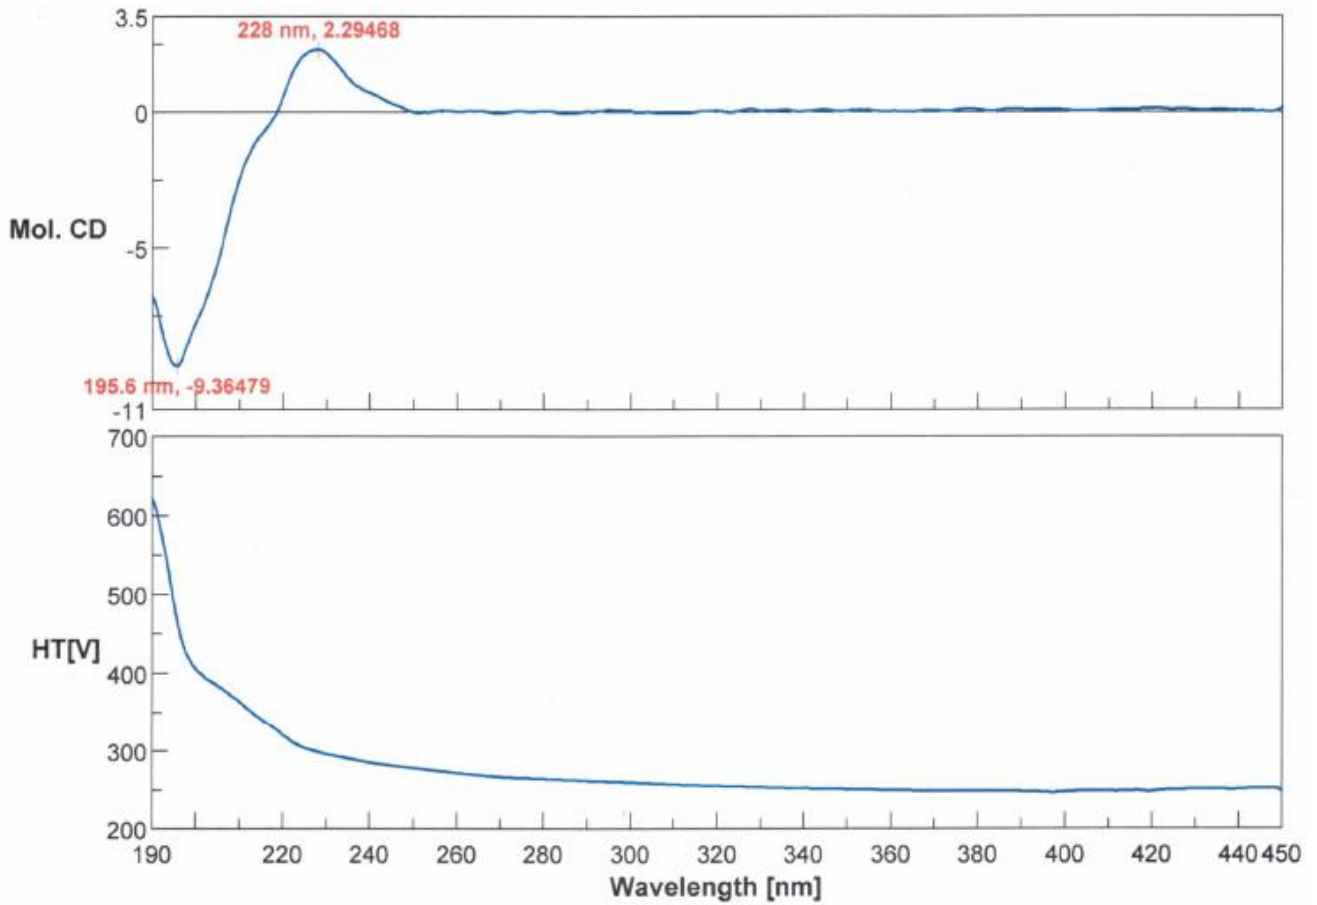

|                   |                  |
|-------------------|------------------|
| Date              | 2019-04-09 10:43 |
| File name         | 5120b(de)        |
| Model             | J-815            |
| Serial No.        | A026861168       |
| Band width        | 1 nm             |
| Response          | 0.5 sec          |
| Sensitivity       | Standard         |
| Measurement range | 450 - 190 nm     |
| Data pitch        | 0.2nm            |
| Scanning speed    | 100 nm/min       |
| Accumulation      | 5                |
| Cell Length       | 0.1 cm           |
| Concentration     | 0.0002069 mol/L  |
| Solvent           | MeCN             |
| Temperature       | Room Temperature |
| Sample name       | Z-236-II         |
| Operator          | Ewa              |
| Comment           |                  |

————— 5120b(de)

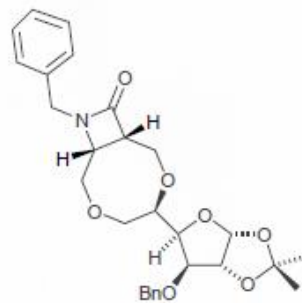

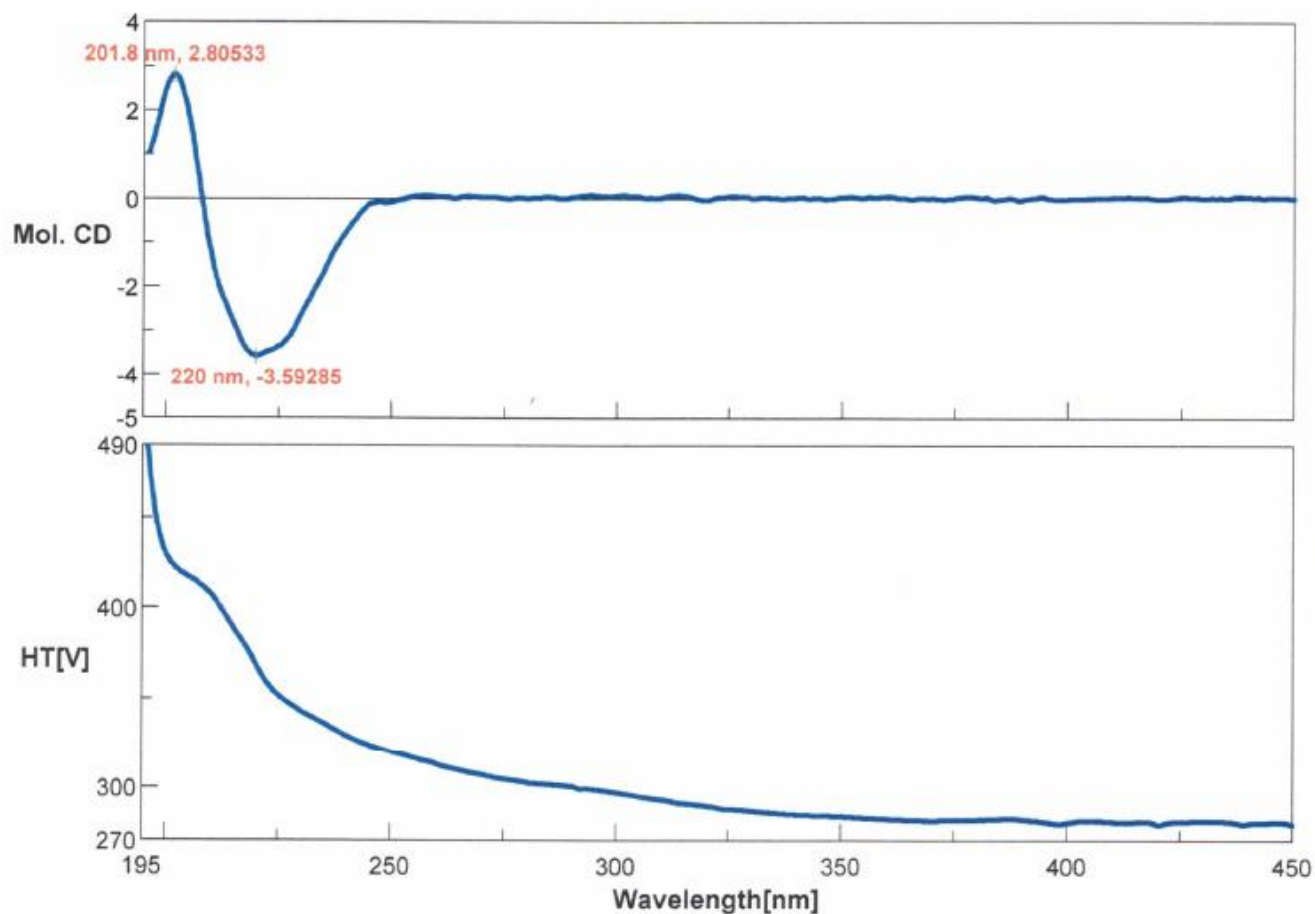

|                   |                             |
|-------------------|-----------------------------|
| Date              | 2019-05-13 10:58            |
| File name         | 5137a(de).jws               |
| Model             | J-715                       |
| Serial No.        | B011960524                  |
| Band width        | 1.0 nm                      |
| Response          | 0.5 sec                     |
| Sensitivity       | Standard                    |
| Measurement range | 450 - 196.2 nm              |
| Data pitch        | 0.2nm                       |
| Scanning speed    | 100 nm/min                  |
| Accumulation      | 5                           |
| Sample name       | Z-242-II                    |
| Operator          | Ola                         |
| Comment           | d=0.1cm, MeCN, C=0,0002545M |

— 5137a(de).jws

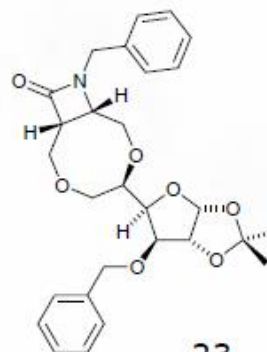

23

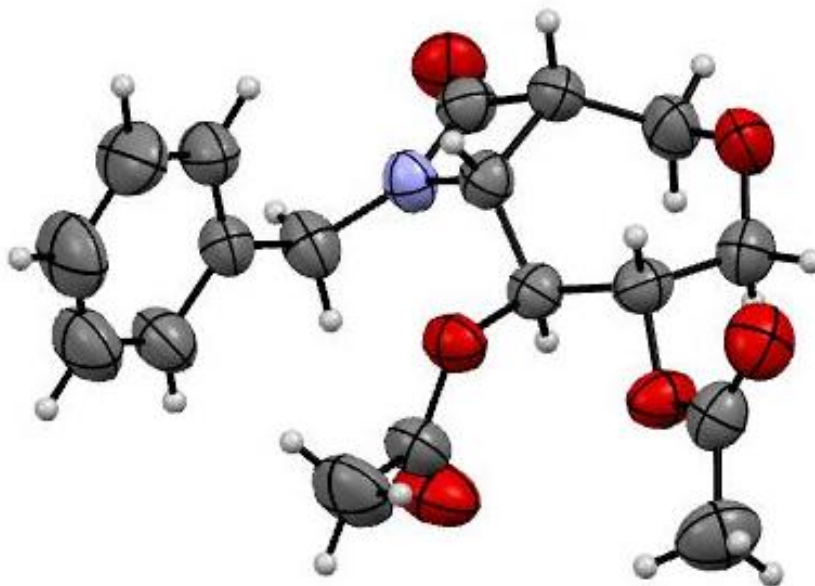

**Figure S1.** ORTEP plot of **30**, represented by thermal ellipsoids shown at the 50% probability level.

Colorless crystals suitable for X-ray structural analysis were obtained by slow evaporation of heptane–ethyl acetate solution of **30**. Crystal data were obtained on a Bruker X8 APEX II diffractometer with CCD detector employing graphite monochromated Cu-K $\alpha$  radiation ( $\lambda=1.54178$  Å) at 296(2) K and operating in the  $\phi$ - $\omega$  scan mode. The structure was solved by direct methods SHELXS-2014<sup>[1]</sup> and refined with full-matrix least-squares calculations on  $F^2$  using SHELX-2014. <sup>[1]</sup> All non-hydrogen atoms were refined anisotropically. The hydrogen atom positions were geometrically idealized and allowed to ride on their parent atoms. Crystallographic data for **30** have been deposited at the Cambridge Crystallographic Data Centre (deposition no. **CCDC 1975296**). Copies of these data can be obtained free of charge *via* [www.ccdc.cam.ac.uk/conts/retrieving.html](http://www.ccdc.cam.ac.uk/conts/retrieving.html) or from the Cambridge Crystallographic Data Centre, 12, Union Road, Cambridge CB21EZ, UK. [fax: (+44) 1223-336-033; or email: [deposit@ccdc.cam.ac.uk](mailto:deposit@ccdc.cam.ac.uk)].

[1] G. M. Sheldrick, SHELXL-2014. Program for the Refinement of Crystal Structures from Diffraction Data, University of Göttingen, Germany, 2014.

**Table S1.** Summary of the crystal parameters and refinement metrics for **30**.

|                                                    |                                                 |                                                         |                                                                 |
|----------------------------------------------------|-------------------------------------------------|---------------------------------------------------------|-----------------------------------------------------------------|
| <b>Chemical formula</b>                            | C <sub>18</sub> H <sub>21</sub> NO <sub>6</sub> | <b><math>\theta</math> range [°]</b>                    | 3.53 to 68.42                                                   |
| <b>Formula weight</b>                              | 347.36 g/mol                                    | <b>Index ranges</b>                                     | -6<= <i>h</i> <=5, -20<= <i>k</i> <=19,<br>-22<= <i>l</i> <=20  |
| <b>CCDC number</b>                                 | 1975296                                         | <b>Reflections collected</b>                            | 14421                                                           |
| <b>Crystal appearance</b>                          | colorless needle                                | <b>Reflections unique</b>                               | 3302 [R(int) = 0.0711]                                          |
| <b>Crystal size [mm]</b>                           | 0.070 x 0.103 x<br>0.558                        | <b>Completeness</b>                                     | 100%                                                            |
| <b>Crystal system</b>                              | Orthorhombic                                    | <b>Absorption correction</b>                            | numerical                                                       |
| <b>Space group</b>                                 | P2 <sub>1</sub> 2 <sub>1</sub> 2 <sub>1</sub>   | <b>Max and min transmission</b>                         | 0.9460 and 0.6630                                               |
| <b><i>a</i> [Å]</b>                                | 5.7158(8)                                       | <b>Solution method</b>                                  | direct methods                                                  |
| <b><i>b</i> [Å]</b>                                | 16.615(2)                                       | <b>Refinement method</b>                                | Full-matrix least-squares<br>on F <sup>2</sup>                  |
| <b><i>c</i> [Å]</b>                                | 19.036(2)                                       | <b>Data/restraints/parameters</b>                       | 3302 / 0 / 258                                                  |
| <b><math>\alpha</math> [°]</b>                     | 90                                              | <b>Goodness-of-fit on F<sup>2</sup></b>                 | 1.017                                                           |
| <b><math>\beta</math> [°]</b>                      | 90                                              | <b>Final R indices [I&gt;2<math>\sigma</math>(I)]</b>   | 2566 data; R <sub>1</sub> = 0.0427,<br>wR <sub>2</sub> = 0.1027 |
| <b><math>\gamma</math> [°]</b>                     | 90                                              | <b>R indices (all data)</b>                             | R <sub>1</sub> = 0.0583,<br>wR <sub>2</sub> = 0.1132            |
| <b><i>V</i> [Å<sup>3</sup>]</b>                    | 1807.8(4)                                       | <b>Absolute structure<br/>parameter</b>                 | 0.3(4)                                                          |
| <b><i>Z</i></b>                                    | 4                                               | <b>Largest diff peak and hole<br/>[eÅ<sup>-3</sup>]</b> | 0.119 and -0.133                                                |
| <b>T [K]</b>                                       | 296(2)                                          | <b>Extinction coefficient</b>                           | 0.0022(5)                                                       |
| <b><i>D</i><sub>calc.</sub> [g/cm<sup>3</sup>]</b> | 1.276                                           |                                                         |                                                                 |
| <b><math>\mu</math> [mm<sup>-1</sup>]</b>          | 0.803                                           |                                                         |                                                                 |
| <b>F(000)</b>                                      | 736                                             |                                                         |                                                                 |
